# Supplementary material for: Effectiveness of real-time continuous glucose monitoring to improve glycaemic control and pregnancy outcome in patients with gestational diabetes mellitus: a study protocol for a randomised controlled trial
Source: PubMed Central journal article supplement — BMJ Open. 2020 Nov 30;10(11):e040498. doi: 10.1136/bmjopen-2020-040498 (PMC7705524; doi:10.1136/bmjopen-2020-040498), 2020-11-30
Supplement: bmjopen-2020-040498.draft_revisions.pdf [file bmjopen-2020-040498.draft_revisions.pdf]

# BMJ Open

BMJ Open is committed to open peer review. As part of this commitment we make the peer review history of every article we publish publicly available.

When an article is published we post the peer reviewers' comments and the authors' responses online. We also post the versions of the paper that were used during peer review. These are the versions that the peer review comments apply to.

The versions of the paper that follow are the versions that were submitted during the peer review process. They are not the versions of record or the final published versions. They should not be cited or distributed as the published version of this manuscript.

BMJ Open is an open access journal and the full, final, typeset and author-corrected version of record of the manuscript is available on our site with no access controls, subscription charges or pay-per-view fees (<http://bmjopen.bmj.com>).

If you have any questions on BMJ Open's open peer review process please email [info.bmjopen@bmj.com](mailto:info.bmjopen@bmj.com)

# BMJ Open

## The Effectiveness of Real-Time Continuous Glucose Monitoring to Improve Glycaemic Control and Pregnancy Outcome in Patients with Gestational Diabetes Mellitus: A randomised controlled trial.

|                               |                                                                                                                                                                                                                                                                                                                                                                                                                                                                                                                                                                                                                                                                                                                                                                                                                                                                                                                                                                                                                                                                                                                                                                                                                                                                                                                                                                                                                                                                                                                                                                                                                                                                                                                                                                                                                                                                                                                                                                                                                                                                                                                                                                                                                                                                                                                                                                                                                                 |
|-------------------------------|---------------------------------------------------------------------------------------------------------------------------------------------------------------------------------------------------------------------------------------------------------------------------------------------------------------------------------------------------------------------------------------------------------------------------------------------------------------------------------------------------------------------------------------------------------------------------------------------------------------------------------------------------------------------------------------------------------------------------------------------------------------------------------------------------------------------------------------------------------------------------------------------------------------------------------------------------------------------------------------------------------------------------------------------------------------------------------------------------------------------------------------------------------------------------------------------------------------------------------------------------------------------------------------------------------------------------------------------------------------------------------------------------------------------------------------------------------------------------------------------------------------------------------------------------------------------------------------------------------------------------------------------------------------------------------------------------------------------------------------------------------------------------------------------------------------------------------------------------------------------------------------------------------------------------------------------------------------------------------------------------------------------------------------------------------------------------------------------------------------------------------------------------------------------------------------------------------------------------------------------------------------------------------------------------------------------------------------------------------------------------------------------------------------------------------|
| Journal:                      | <i>BMJ Open</i>                                                                                                                                                                                                                                                                                                                                                                                                                                                                                                                                                                                                                                                                                                                                                                                                                                                                                                                                                                                                                                                                                                                                                                                                                                                                                                                                                                                                                                                                                                                                                                                                                                                                                                                                                                                                                                                                                                                                                                                                                                                                                                                                                                                                                                                                                                                                                                                                                 |
| Manuscript ID                 | bmjopen-2020-040498                                                                                                                                                                                                                                                                                                                                                                                                                                                                                                                                                                                                                                                                                                                                                                                                                                                                                                                                                                                                                                                                                                                                                                                                                                                                                                                                                                                                                                                                                                                                                                                                                                                                                                                                                                                                                                                                                                                                                                                                                                                                                                                                                                                                                                                                                                                                                                                                             |
| Article Type:                 | Protocol                                                                                                                                                                                                                                                                                                                                                                                                                                                                                                                                                                                                                                                                                                                                                                                                                                                                                                                                                                                                                                                                                                                                                                                                                                                                                                                                                                                                                                                                                                                                                                                                                                                                                                                                                                                                                                                                                                                                                                                                                                                                                                                                                                                                                                                                                                                                                                                                                        |
| Date Submitted by the Author: | 15-May-2020                                                                                                                                                                                                                                                                                                                                                                                                                                                                                                                                                                                                                                                                                                                                                                                                                                                                                                                                                                                                                                                                                                                                                                                                                                                                                                                                                                                                                                                                                                                                                                                                                                                                                                                                                                                                                                                                                                                                                                                                                                                                                                                                                                                                                                                                                                                                                                                                                     |
| Complete List of Authors:     | <p>Huhn, Evelyn; Frauenklinik Universitatsspital Basel, Obstetrics and Gynaecology</p> <p>Eppel, Daniel; Medical University of Vienna Department of Obstetrics and Gynaecology, Department of Obstetrics and Feto-maternal Medicine</p> <p>Weißhaupt, Karen; Charite Universitatsmedizin Berlin, Clinic of Obstetrics, Charité-Universitätsmedizin Berlin, Corporate Member of Freie Universität Berlin, Humboldt-Universität zu Berlin, and Berlin Institute of Health, Campus Virchow-Klinikum</p> <p>Klapp, Christine; Charite Universitatsmedizin Berlin, Clinic of Obstetrics, Charité-Universitätsmedizin Berlin, Corporate Member of Freie Universität Berlin, Humboldt-Universität zu Berlin, and Berlin Institute of Health, Campus Virchow-Klinikum</p> <p>Schellong, Karen; Charite Universitatsmedizin Berlin, Clinic of Obstetrics, Charité-Universitätsmedizin Berlin, Corporate Member of Freie Universität Berlin, Humboldt-Universität zu Berlin, and Berlin Institute of Health, Campus Virchow-Klinikum</p> <p>Henrich, Wolfgang; Charite Universitatsmedizin Berlin, Clinic of Obstetrics, Charité-Universitätsmedizin Berlin, Corporate Member of Freie Universität Berlin, Humboldt-Universität zu Berlin, and Berlin Institute of Health, Campus Virchow-Klinikum</p> <p>Yerlikaya-Schatten, Gülen; Medical University of Vienna Department of Obstetrics and Gynaecology, Department of Obstetrics and Feto-maternal Medicine</p> <p>Rosicky, Ingo; Medical University of Vienna Department of Obstetrics and Gynaecology, Department of Obstetrics and Feto-maternal Medicine</p> <p>Husslein, Peter; Medizinische Universität Wien, Obstetrics and Gynaecology, Devision of Obstetrics and feto-maternal Medicine</p> <p>Chalubinski, Kinga; Medical University of Vienna Department of Obstetrics and Gynaecology, Department of Obstetrics and Feto-maternal Medicine</p> <p>Mittlbock, Martina; Medical University of Vienna Department of Obstetrics and Gynaecology, Center of Medical Statistics, Informatics, and Intelligent Systems, Section for Clinical Biometrics</p> <p>Rust, Petra; University of Vienna, Department of Nutritional Sciences</p> <p>Hoesli, Irene; University Hospital, University Basel, Obstetrics</p> <p>Donath, Marc; University Hospital Basel, Department of Endocrinology and Diabetology</p> <p>Winzeler, Bettina; University Hospital Basel, Department of</p> |

|           |                                                                                                                                                                                                                                                                                                                                                                                                                                                                                                                                                                                                                                                                                                                                                                                                                                                                                                                                                                                                                                                                                                                                                                                                                                                                                                                                                                                                                                                                                                                                                                                                                                                                                                                                                                                                                                                                                     |
|-----------|-------------------------------------------------------------------------------------------------------------------------------------------------------------------------------------------------------------------------------------------------------------------------------------------------------------------------------------------------------------------------------------------------------------------------------------------------------------------------------------------------------------------------------------------------------------------------------------------------------------------------------------------------------------------------------------------------------------------------------------------------------------------------------------------------------------------------------------------------------------------------------------------------------------------------------------------------------------------------------------------------------------------------------------------------------------------------------------------------------------------------------------------------------------------------------------------------------------------------------------------------------------------------------------------------------------------------------------------------------------------------------------------------------------------------------------------------------------------------------------------------------------------------------------------------------------------------------------------------------------------------------------------------------------------------------------------------------------------------------------------------------------------------------------------------------------------------------------------------------------------------------------|
|           | <p>Endocrinology and Diabetology<br/> Jendle, Johan ; Orebro Universitet, Institution of Medical Sciences<br/> Fadl, Helena; Orebro Universitet, Institution of Medical Sciences<br/> Fehm, T; University Hospital Düsseldorf, Department of Obstetrics and<br/> Gynaecology, Medical Faculty, Heinrich-Heine University Düsseldorf,<br/> Icks, Andrea; Heinrich-Heine-Universitat Dusseldorf, Institute of Health<br/> Services Research and Health Economics; German Diabetes Center at<br/> the Heinrich-Heine-University, Leibniz Center for Diabetes Research, Paul<br/> Langerhans Group for Health Services Research and Health Economics<br/> Vomhof, Markus; Deutsches Diabetes-Zentrum Leibniz-Zentrum für<br/> Diabetes-Forschung, Institute for Health Services Research and Health<br/> Economics; Universitätsklinikum Düsseldorf Centre for Health and<br/> Society, Institute for Health Services Research and Health Economics<br/> Greiner, Gregory; Deutsches Diabetes-Zentrum Leibniz-Zentrum für<br/> Diabetes-Forschung, Institute for Health Services Research and Health<br/> Economics, German Diabetes Center at Heinrich-Heine University<br/> Düsseldorf, Leibniz Institute for Diabetes Research, Düsseldorf, Germany<br/> Szendrödi, Julia; Deutsches Diabetes-Zentrum Leibniz-Zentrum für<br/> Diabetes-Forschung, Institute for Health Services Research and Health<br/> Economics<br/> Roden, Michael; Universitätsklinikum Düsseldorf Centre for Health and<br/> Society, Institute for Health Services Research and Health Economics<br/> Tura, Andrea; Institute of Molecular Science and Technologies Padova<br/> Branch National Research Council, Metabolic Unit, Institute of<br/> Neuroscience<br/> Göbl, Christian; Medizinische Universität Wien, Obstetrics and<br/> Gynaecology, Devision of Obstetrics and feto-maternal Medicine</p> |
| Keywords: | <p>Diabetes in pregnancy &lt; DIABETES &amp; ENDOCRINOLOGY, Fetal medicine<br/> &lt; OBSTETRICS, Maternal medicine &lt; OBSTETRICS</p>                                                                                                                                                                                                                                                                                                                                                                                                                                                                                                                                                                                                                                                                                                                                                                                                                                                                                                                                                                                                                                                                                                                                                                                                                                                                                                                                                                                                                                                                                                                                                                                                                                                                                                                                              |
|           |                                                                                                                                                                                                                                                                                                                                                                                                                                                                                                                                                                                                                                                                                                                                                                                                                                                                                                                                                                                                                                                                                                                                                                                                                                                                                                                                                                                                                                                                                                                                                                                                                                                                                                                                                                                                                                                                                     |

SCHOLARONE™  
Manuscripts

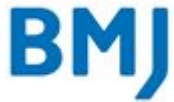

I, the Submitting Author has the right to grant and does grant on behalf of all authors of the Work (as defined in the below author licence), an exclusive licence and/or a non-exclusive licence for contributions from authors who are: i) UK Crown employees; ii) where BMJ has agreed a CC-BY licence shall apply, and/or iii) in accordance with the terms applicable for US Federal Government officers or employees acting as part of their official duties; on a worldwide, perpetual, irrevocable, royalty-free basis to BMJ Publishing Group Ltd ("BMJ") its licensees and where the relevant Journal is co-owned by BMJ to the co-owners of the Journal, to publish the Work in this journal and any other BMJ products and to exploit all rights, as set out in our [licence](#).

The Submitting Author accepts and understands that any supply made under these terms is made by BMJ to the Submitting Author unless you are acting as an employee on behalf of your employer or a postgraduate student of an affiliated institution which is paying any applicable article publishing charge ("APC") for Open Access articles. Where the Submitting Author wishes to make the Work available on an Open Access basis (and intends to pay the relevant APC), the terms of reuse of such Open Access shall be governed by a Creative Commons licence – details of these licences and which [Creative Commons](#) licence will apply to this Work are set out in our licence referred to above.

Other than as permitted in any relevant BMJ Author's Self Archiving Policies, I confirm this Work has not been accepted for publication elsewhere, is not being considered for publication elsewhere and does not duplicate material already published. I confirm all authors consent to publication of this Work and authorise the granting of this licence.

## Study protocol

### **The Effectiveness of Real-Time Continuous Glucose Monitoring to Improve Glycaemic Control and Pregnancy Outcome in Patients with Gestational Diabetes Mellitus: A randomised controlled trial.**

Evelyn Huhn (1), Daniel Eppel (2), Karen Weißhaupt (3), Christine Klapp (3), Karen Schellong (3), Wolfgang Henrich (3), Gülen Yerlikaya-Schatten (2), Ingo Rosicky (2), Peter Husslein (2), Kinga Chalubinski (2), Martina Mittlböck (4), Petra Rust (5), Irene Hoesli (1), Marc Donath (6), Bettina Winzeler (6), Johan Jendle (7), Helena Fadl (7), Tanja Fehm (8), Andrea Icks (9, 10, 11), Markus Vomhof (9, 10, 11), Gregory Greiner (9, 10, 11), Julia Szendrödi (11,12,13), Michael Roden (11, 12, 13), Andrea Tura (14), Christian Göbl (2)

(1) Department of Obstetrics and Gynaecology, University Hospital Basel, Basel, Switzerland

(2) Department of Obstetrics and Gynecology, Division of Obstetrics and Feto-maternal Medicine, Medical University of Vienna, Vienna, Austria

(3) Clinic of Obstetrics, Charité-Universitätsmedizin Berlin, Corporate Member of Freie Universität Berlin, Humboldt-Universität zu Berlin, and Berlin Institute of Health, Campus Virchow-Klinikum, Berlin, Germany

(4) Center of Medical Statistics, Informatics, and Intelligent Systems, Section for Clinical Biometrics, Medical University of Vienna, Vienna, Austria

(5) Department of Nutritional Sciences, University of Vienna, Austria

(6) Department of Endocrinology and Diabetology, University Hospital Basel, Basel, Switzerland

(7) Institution of Medical Sciences, Örebro University, Örebro, Sweden

(8) Department of Obstetrics and Gynaecology, Medical Faculty, Heinrich-Heine University Düsseldorf, Düsseldorf, Germany

(9) Institute of Health Services Research and Health Economics, Centre for Health and Society, Faculty of Medicine, Heinrich Heine University, Düsseldorf, Germany

(10) Institute for Health Services Research and Health Economics, German Diabetes Center at Heinrich-Heine University Düsseldorf, Leibniz Institute for Diabetes Research, Düsseldorf, Germany

(11) German Center for Diabetes Research, München-Neuherberg, Germany

(12) Division of Endocrinology and Diabetology, Medical Faculty, Heinrich-Heine University Düsseldorf, Düsseldorf, Germany

(13) Institute for Clinical Diabetology, German Diabetes Centre, Leibniz Institute for Diabetes Research at Heinrich-Heine University, Düsseldorf, Germany

(14) Metabolic Unit, Institute of Neuroscience, National Research Council, Padova, Italy

#### Corresponding Address

Christian S. Göbl, MD PhD

Department of Obstetrics and Gynaecology

Division of Obstetrics and feto-maternal Medicine

Medical University of Vienna

Währinger Gürtel 18-20

A.1090 Vienna

Tel.: 0043 1 40400 28220

Email: [Christian.goebl@meduniwien.ac.at](mailto:Christian.goebl@meduniwien.ac.at)

1  
2  
3 **Conflict of interest**

4 The authors declare that there are no further financial or personal relationships with other  
5 people or organizations that could inappropriately influence the work reported or the  
6 conclusions, implications, or opinions stated.  
7  
8  
9

10  
11 KEY WORDS: Gestational diabetes mellitus, diagnosis, real-time continuous glucose  
12 monitoring, glycaemic control.  
13  
14

15 **Short title:** Continuous glucose monitoring to improve glycaemic control and pregnancy  
16 outcome in gestational diabetes.  
17  
18

19  
20 Manuscript includes: 26 text pages (26 in total with front page, references)  
21  
22  
23  
24  
25  
26  
27  
28  
29  
30  
31  
32  
33  
34  
35  
36  
37  
38  
39  
40  
41  
42  
43  
44  
45  
46  
47  
48  
49  
50  
51  
52  
53  
54  
55  
56  
57  
58  
59  
60

## 1 Abstract

**Introduction:** Real-time continuous glucose monitoring (rt-CGM) systems provide users with information about current interstitial glucose levels and allows early detection of glycaemic excursions and accordingly timely adaptation by behavioural change or pharmacologic intervention. Randomized controlled studies adequately powered to evaluate the impact of long-term application of rt-CGM systems on the risk reduction of adverse obstetric outcomes are missing.

**Methods and analysis:** Open-label multicentre randomized controlled trial with two parallel groups including a total of 372 female patients with a recent diagnosis of gestational diabetes (GDM): 186 with rt-CGM (Dexcom G6) and 186 with self-monitored blood glucose (SMBG). Women with GDM will be consecutively recruited and randomized to rt-CGM or control (SMBG) group after a run-in period of 6 to 8 days. The third visit will be scheduled 8 to 10 days later and then every two weeks. At every visit, glucose measurements will be evaluated and all patients will be treated according to the standard care. From second to third visit as well as once for 10 days between gestational week 36+0 and 38+6 the control group will receive blinded CGM. Cord blood will be sampled immediately after delivery. A postpartum examination will be scheduled within 48 hours after delivery for assessment of neonatal biometry and maternal HbA1c, as well as between week 8 to 16 after delivery in all patients for a detailed re-examination of glucose metabolism including blinded CGM for 8 to 10 days in both groups. Primary outcome is the difference in the proportion of LGA newborns. Rate of neonatal hypoglycaemia, caesarean section, shoulder dystocia and neonatal anthropometry are secondary outcomes.

**Ethics and dissemination:** This study received ethical approval from the main ethic committee in Vienna. It was registered under [www.ClinicalTrials.gov](http://www.ClinicalTrials.gov) (NCT03981328). Data will be presented at international conferences and published in peer-reviewed journals.

1  
2  
3 Strengths and limitations of the study:  
4

- 5 - This is a randomised controlled trial recruiting 372 pregnant women after the GDM  
6 diagnosis at 5 sites in Austria, Germany, Sweden and Switzerland.  
7  
8 - The study uses the newest version a of “real-time” CGM (rt-CGM) system which  
9 enables the user identify rapidly glycaemic excursions and allows timely adaptation by  
10 behavioural change or pharmacologic intervention.  
11  
12 - The study will increase knowledge about possible limitations of SMBG (routine care),  
13 such as undetected hyper- or hypoglycaemia.  
14  
15 - The study might show possible improvement of adverse perinatal outcome and  
16 particularly fetal macrosomia in offspring of mothers with GDM monitored by rt-CGM  
17 versus SMGB.  
18  
19  
20  
21  
22  
23  
24  
25  
26  
27  
28  
29  
30  
31  
32  
33  
34  
35  
36  
37  
38  
39  
40  
41  
42  
43  
44  
45  
46  
47  
48  
49  
50  
51  
52  
53  
54  
55  
56  
57  
58  
59  
60



## 2 Introduction

The incidence of obesity and diabetes is rising worldwide even in younger populations. With a rise in maternal obesity also gestational diabetes mellitus (GDM) becomes more prevalent with a prevalence of up to 18% of pregnancies<sup>1,2</sup>. Previous studies found hyperglycaemia in pregnancy to be associated with gestational complications including macrosomia and neonatal hyperinsulinaemic hypoglycaemia<sup>3</sup> and an increased long-term risk for obesity or diabetes in the offspring's later life<sup>4</sup>. Large interventional trials provided evidence that obstetric and neonatal complications such as large for gestational age offspring (LGA, defined as birthweight >90th pctl) or shoulder dystocia can be significantly reduced by intensified treatment of even mild forms of maternal hyperglycaemia (e.g. by lifestyle modification or pharmacotherapy)<sup>5-7</sup>.

Continuous glucose monitoring (CGM) has been shown to improve glycaemic control without increasing the risk of hypoglycaemia in patients with type 1 and 2 diabetes<sup>8,9</sup>. However, only a small number of studies evaluated the use of CGM in pregnancies affected by GDM: In the setting of a larger non-randomized observational study Yu et al.<sup>10</sup> found that mothers in the CGM group (use over 72 hours every 2 to 4 weeks) had improved glycaemic control as well as a lower amount of glycaemic variability as compared to a control group using self-monitored blood glucose (SMBG). In addition, the CGM-group showed lower birth weight percentiles associated with a lower risk for LGA offspring (13.7 vs. 25.8%) or neonatal hypoglycaemia (5.5 vs. 14%). Also a second observational study including 57 pregnant women with GDM indicated that CGM was more effectively detecting hyperglycaemic episodes as well as nocturnal hypoglycaemia than SMBG<sup>11</sup>. A study in 73 pregnant women with GDM, randomly assigned to either SMBG or CGM for a duration of 48h after diagnosis, found that CGM detected a markedly higher proportion of women requiring glucose lowering pharmacotherapy (31 vs 8%)<sup>12</sup>. Another randomized controlled trial on 106 women with GDM observed significantly lower weight gain associated with CGM. LGA cases were more often observed in the SMBG group (52.7 vs. 35.3%). However, the difference failed statistical significance as the study was not powered for obstetrical outcomes<sup>13</sup>.

Unfortunately, both randomized controlled studies used older versions of a blinded CGM device, where glucose values were not directly visible for patients. In contrast, more recently developed "real-time" CGM (rt-CGM) systems provide users with information about current glucose levels and alert the patient before the upper or lower glucose threshold is reached or when glucose levels change rapidly. Hence, glycaemic excursions can be rapidly identified and accordingly adapted by behavioural change or pharmacologic intervention. A number of studies including non-pregnant patients showed superiority of rt-CGM over older blinded CGM versions in order to effectively empower and educate patients with diabetes to better understand how dietary habits, exercise or pharmacotherapy affects their glucose

1  
2  
3 levels<sup>14</sup>. A beneficial effect of rt-CGM in pregnancy was also supported by the CONCEPT  
4 trial for pregnant women with type 1 diabetes<sup>15</sup>. Only one recent study compared SMBG with  
5 rt-CGM in women with GDM using a single application for 3 to 7 days within two weeks after  
6 diagnosis but it failed to demonstrate improvements in HbA1c or pregnancy outcomes, which  
7 was, however, likely due to the sample size and the short duration of intervention (single  
8 application)<sup>16</sup>.

9  
10  
11  
12 Taken together, larger randomized controlled studies adequately powered to evaluate  
13 the impact of long-term application of rt-CGM systems on the risk reduction of adverse obstetric  
14 outcomes are missing<sup>17</sup>. Of note, such studies are of high clinical relevance because of their  
15 guideline-changing potential. In addition, rt-CGM has the potential to reduce reported barriers  
16 to SMBG (such as inconvenience, pain or stigma of testing in public places) in order to improve  
17 poor reliability and adherence to glucose monitoring, which is a non-negligible problem in the  
18 treatment of GDM<sup>18</sup>.

### 19 20 21 22 23 24 *Hypotheses*

25  
26 The main hypothesis of the proposed study is that rt-CGM can effectively reduce the risk for  
27 neonatal and obstetric complications. It is further hypothesized that rt-CGM can improve  
28 maternal glycaemic control, body weight gain during pregnancy and (as rt-CGM potentially  
29 improves self-management strategies) has beneficial effects on maternal metabolism after  
30 pregnancy.

### 31 32 33 34 *Primary and secondary outcomes*

35  
36 *Primary objective:* To assess differences in the proportion of LGA newborns (birth weight >90th  
37 pctl) in women with GDM using rt-CGM as compared to women with GDM using SMBG.

38  
39 *Secondary objectives:* To assess differences in further obstetric or neonatal complications,  
40 neonatal hypoglycaemia, rate of caesarean section, shoulder dystocia and neonatal  
41 anthropometry will be assessed as secondary objectives. Further secondary outcomes are:  
42 differences in neonatal hyperinsulinemia, rt-CGM measures such as mean interstitial glucose,  
43 glycaemic variability, time in target (65 to 140 mg/dl [3.6 to 7.8 mmol/l]) as well as time spent  
44 in hyper- and hypoglycaemia (Time above and below range) (day-time: 07.01 to 22.59hr and  
45 night-time: 23.00 to 07.00hr), duration and frequency postprandial hyperglycaemic excursions,  
46 start and amount of glucose lowering therapy, HbA1c, glycosylated fibronectin, change in  
47 bodyweight during pregnancy and after delivery as well as glucose disposal at postpartum  
48 (markers of insulin sensitivity, insulin secretion and  $\beta$ -cell function assessed by a postpartum  
49 OGTT). Health-related quality of life (HRQoL) is a patient-reported outcome which has become  
50 as important in the evaluation of interventions as patient-relevant clinical outcomes. Therefore,  
51 HRQoL will be elicited. In addition, preferences will be assessed, and a health economic  
52 evaluation in terms of cost-effectiveness and cost-utility analysis will be performed.  
53  
54  
55  
56  
57  
58  
59  
60

1  
2  
3 *Expected effects on the advancement of clinical practice*

4 The aim of this proposal is to assess the ability of rt-CGM to improve glycaemic control  
5 (reduction of mean glucose, hyperglycaemic episodes and duration, improvement of glycaemic  
6 variability) in order to prevent adverse pregnancy outcomes and neonatal complications in  
7 women with GDM. The results of this study will contribute to:  
8

- 9  
10  
11 • The improvement of clinical monitoring and management of glucose metabolism during  
12 pregnancy with GDM  
13  
14 • Increased knowledge about possible limitations of SMBG (routine care), such as undetected  
15 hyper- or hypoglycaemia, as well as to determine if comprehensive glucose data (as derived  
16 from rt-CGM) results in more or fewer women needing pharmacotherapy  
17  
18 • Possible improvement of adverse perinatal outcome and particularly fetal macrosomia in  
19 offspring of mothers with GDM  
20  
21  
22  
23  
24  
25  
26  
27  
28  
29  
30  
31  
32  
33  
34  
35  
36  
37  
38  
39  
40  
41  
42  
43  
44  
45  
46  
47  
48  
49  
50  
51  
52  
53  
54  
55  
56  
57  
58  
59  
60

### 3 Methods and analysis

#### *Participants and recruitment; Inclusion criteria*

This study is designed as an open-label multicentre randomized controlled trial with two parallel groups including a total of 372 female patients (n=186 with rt-CGM, n=186 with SMBG) with a recent diagnosis of GDM. Diagnosis of GDM (i.e. diabetes first diagnosed in the second and third trimester and not clearly type 1 or type 2 diabetes<sup>19</sup>) is made in accordance with the IADPSG criteria after 24+0 weeks of gestation by a 2h 75g OGTT<sup>20</sup>. The study will be conducted at five academic hospitals in Austria, Switzerland, Sweden and Germany. All pregnant females (aged between 18 and 55 years) will be consecutively recruited after diagnosis of GDM until 31+6 weeks of gestation among women visiting the pregnancy outpatient departments (Division of Obstetrics and feto-maternal Medicine, Medical University of Vienna; Division of Obstetrics, University Hospital Basel; Department of Obstetrics, Charité-Universitätsmedizin Berlin) or the diabetes outpatient departments (Division of Endocrinology and Metabolic Diseases at the Heinrich Heine University, Düsseldorf; Department of Medicine, University Hospital, Örebro).

#### *Exclusion criteria*

Overt diabetes (i.e. pregestationally known type 1 or type 2 diabetes or fasting plasma glucose during the OGTT  $\geq 126$  mg/dl [7.0 mmol/l] or HbA1c  $\geq 6.5\%$  [44 mmol/l] or 2h post-load OGTT levels  $\geq 200$  mg/dl [11.1 mmol/l] assessed before 24+0 weeks of gestation, whereby results need to be confirmed by repeated testing in case of unequivocal hyperglycaemia according to the ADA standards<sup>19</sup>), history of bariatric surgery or other surgeries that induce malabsorption, long-term use (>2 weeks) of systemic steroids prior to enrolment, multiple pregnancy, patients already using glucose lowering medications (metformin or insulin) before study entry, fetal growth restriction due to placental dysfunction at study entry, inpatient psychiatric treatment up to 1 year before enrolment, participation in this study in previous pregnancy.

#### *Study visits during pregnancy*

A broad risk evaluation will be performed in participating females at the initial contact (V1) including: evaluation of maternal age, parity, history of GDM in previous pregnancies, detailed family history, ethnicity, preconceptional diseases, obstetric history. Height (stadiometer measured to the nearest centimeter) and actual weight (calibrated scales, light indoor clothing) will be additionally assessed. Moreover, an evaluation of preconceptional weight (self-reported) and body mass index (BMI) as well as measurement of blood pressure will be performed. All patients receive medical advice for nutrition (isocaloric diet containing 40-50% carbohydrates, 20% proteins and 30-35% fat, divided into three meals and three snacks) and regular physical exercising for 30 minutes per day following international recommendations. In addition, participants are advised on capillary blood glucose measurement (fasting as well as

1  
2  
3 1h after starting each meal) at the initial visit (V1). Randomization will be done after a run-in  
4 period of 6 to 8 days (V2). The third visit (V3) will be scheduled 8 to 10 days after V2 and  
5 further follow-up visits every two weeks (i.e. 12 to 16 days after each visit). HbA1c and  
6 glycosylated fibronectin will be assessed at V2 as well as at the first visit between 36+0 and  
7 38+6 weeks of gestation (12 ml, non-fasting state) (V4). Detailed fetal ultrasound  
8 examinations, a detailed examination of dietary intake as well as a blinded CGM (control group  
9 only) will be performed at V2 and V4. Body weight change and use of glucose lowering  
10 medications (amount of insulin units) will be examined at every visit. At every follow-up visit  
11 glucose measurements (SMBG or rt-CGM) and routine ultrasound examinations (fetal  
12 biometry and umbilical artery doppler) will be evaluated by the medical staff and all patients  
13 will be treated according to the standard of care for patients with GDM. This includes lifestyle  
14 modification and insulin therapy if recommended thresholds are exceeded. Both groups will be  
15 treated to be in the target range between 65 to 140 mg/dl [3.6 to 7.8 mmol/l] with at least 8h  
16 fasting glucose levels equal or below 95 mg/dl [5.3 mmol/l] and 1h postprandial glucose  
17 measurements equal or below 140 mg/dl [7.8 mmol/l] in accordance with the CONCEPTT  
18 study<sup>15</sup> and the ADA recommendations<sup>21</sup>, respectively. Intermediate acting neutral protamine  
19 Hagedorn (NPH) insulin is started in the evening if  $\geq 2$  measurements of fasting glucose are  
20 equal or above 95 mg/dl [5.3 mmol/l] in a period of one week and rapid acting insulin analogues  
21 (Aspart or Lispro) if  $\geq 2$  measurements of 1h postprandial glucose (either after breakfast, lunch  
22 or dinner) are equal or above 140 mg/dl [7.8 mmol/l] in a period of one week. NPH is started  
23 with 6 to 10 IU and increased by 4 IU (or in case of higher doses i.e.  $>25$  IU by 20%) and rapid  
24 acting insulin (bolus insulin) is started with 2 to 4 IU and increased by 2 to 4 IU if thresholds  
25 are not achieved within three days. Long acting insulin analogues such as glargine  
26 (U100/U300) or detemir can be used as an alternative to NPH if necessary. Patients are trained  
27 on insulin management and titration according to their glucose levels. Metformin can be used  
28 according to local practice guidelines (recommended in Sweden but not in Austria, Germany  
29 or Switzerland as first-line pharmacological intervention).

#### 46 *Study visits postpartum*

47  
48 Cord blood will be sampled and stored (at  $-80^{\circ}\text{C}$ ) immediately after delivery (VPP0). A  
49 postpartum examination will be scheduled within 48 hours after delivery (VPP1) for  
50 assessment of neonatal parameters and maternal HbA1c and glycosylated fibronectin (12 ml,  
51 non-fasting state), as well as between 8 to 16 weeks after delivery (VPP2) in all patients for a  
52 detailed re-examination of glucose homeostasis postpartum (including lifestyle and dietary  
53 pattern as well as HbA1c, glycosylated fibronectin as well as a blinded CGM for 10 days and  
54 an OGTT to assess the presence of prediabetic conditions after pregnancy with GDM). The  
55 postpartum OGTT is further used to provide estimates of insulin sensitivity,  $\beta$ -cell function and  
56 hepatic insulin extraction, the major physiological components of impaired glucose tolerance.  
57  
58  
59  
60

### *Randomization*

Participants will be randomized to either treatment (rt-CGM augmented glucose monitoring) or control group (routine care SMBG) in a 1:1 ratio. The minimization method<sup>22</sup> with a 0.85 assignment probability will be used to minimize the imbalance between the groups according to week of gestation at study entry i.e. at V1 (three strata: 24+0 to 25+6, 26+0 to 27+6, 28+0 to 29+6, 30+0 to 31+6), previous pregnancy with GDM (two strata: yes or no) and preconceptional overweight/obesity status with three strata: i. normal weight (i.e. BMI below 25.0 kg/m<sup>2</sup>); ii. overweight (BMI 25.0 – 29.9 kg/m<sup>2</sup>); iii. obesity (BMI equal or above 30.0 kg/m<sup>2</sup>). Randomization will be performed at the second study visit (V2) by using a randomization software provided by the Medical University of Vienna.

### *Intervention*

Patients randomized to the intervention group will be equipped with a rt-CGM sensor (Dexcom G6 sensor, a small flexible device that records interstitial glucose levels every five minutes) at V2. The sensor will be inserted into the subcutaneous tissue of the anterior abdominal wall (if this location is not tolerated by the pregnant patients, the upper buttock or posterior upper arm may be used instead). Additionally, patients will be advised to record capillary blood glucose values if glucose alerts or readings do not match with symptoms or expectations. Participants will be educated on how to exchange the sensor (has to be exchanged every ten days) and will be equipped with a real-time CGM monitor and instructed in its use. The monitor provides the user with information about current glucose levels and notifies the patient before her upper or lower glucose threshold are reached and when glucose levels change rapidly. All patients in the intervention group will be specially trained in the use of the system. As an alternative to the real-time monitor the patients' smart phone with an anonymized access to the CLARITY<sup>®</sup> mobile app can be used (details see below: "Intervention: Device description").

#### *Intervention: Device description*

The Dexcom G6 intended use is for the management of diabetes in persons aged 2 years and older. The Dexcom G6 System is intended to replace fingerstick blood glucose testing for diabetes treatment decisions. Interpretation of the Dexcom G6 System results should be based on the glucose trends and several sequential readings over time. The Dexcom G6 System also aids in the detection of episodes of hyperglycaemia and hypoglycaemia, facilitating both acute and long-term therapy adjustments. The Dexcom G6 System can be used alone or in conjunction with digitally connected medical devices for the purpose of managing diabetes.

The system consists of a sensor, transmitter, receiver, and mobile app. The sensor is a small, flexible wire inserted into subcutaneous tissue where it converts glucose into electrical current. The sensor incorporates an interferent layer that minimizes the effect of potential electroactive interferents, such as acetaminophen, by preventing it from reaching the sensor wire surface. The benefit of this interferent layer in blocking the effects of acetaminophen

1  
2  
3 prevents falsely high glucose readings. Thus, users may ingest acetaminophen while wearing  
4 the G6 CGM system. The transmitter, which is connected to the sensor and worn on the body,  
5 samples the electrical current produced by the sensor and converts the measurement into a  
6 glucose reading using an onboard algorithm. The receiver and/or the app displays the glucose  
7 reading along with a rate of change arrow and a trend graph. Additionally, the receiver and/or  
8 app issues alarms and alerts to notify the patient of glucose level changes and other important  
9 system conditions. The app provides the additional capability to share data with “followers”  
10 using the Dexcom Share service. The receiver can be put into a blinded mode using CLARITY®  
11 software. In this mode, users are unable to see the CGM data or receive CGM alerts.

12  
13  
14  
15  
16  
17  
18  
19  
20  
21  
22  
23  
24  
25  
26  
27  
28  
29  
30  
31  
32  
33  
34  
35  
36  
37  
38  
39  
40  
41  
42  
43  
44  
45  
46  
47  
48  
49  
50  
51  
52  
53  
54  
55  
56  
57  
58  
59  
60  
CGM Ancillary Devices Dexcom CLARITY® is an accessory for users of the Dexcom  
CGM system. It is a software program that allows the transfer of glucose data from the CGM  
system to Dexcom remote servers for data management to allow the use of the CGM data by  
the user and study clinicians. Target ranges of 65 to 140 mg/dl [3.6 to 7.8 mmol/l] will be set  
and the patients will be introduced in the use of alarm settings. Both participants and study  
sites will use CLARITY® to transfer glucose data between user and study site, whether CGM  
is used in blinded or real-time mode. A CLARITY® mobile app can be used for a retrospective  
review of glucose data on the smart device and can also be set up to allow receipt of push  
notifications of CGM data facilitating weekly data review. For all patients (intervention and  
control group) an anonymized CLARITY® account will be created by using a sequential study  
number which is allocated at randomization (sex will be female and birth date for each account  
will be set to 1.1.1990 for all accounts).

*Intervention: Study proceedings*

- For participants who have a supported phone, the G6 CGM app will be installed on participant's smart phone.
- An anonymized CLARITY® mobile account will be set up and linked to the research site.
- Participants will use CGM data for their diabetes management.
- A high alert threshold will be set at 140 mg/dl [7.8 mmol/l]. Low alert threshold and urgent low soon alerts will be turned off. If participants require insulin, the low alert will be turned on and the threshold set at 65 mg/dl [3.6 mmol/l]. In addition, the urgent low alert (55 mg/dl [3.1 mmol/l]), the urgent low soon alert (when glucose levels are falling fast and will be below 55 mg/dl [3.1 mmol/l] in less than 20 min) as well as alerts for rise and fall rate (3 mg/dl [0.17 mmol/l]) in addition to alerts for signal loss and no readings for more than 20 min will be enabled.
- Participants with applicable smart phones may have CLARITY® push notifications on the CLARITY® mobile app about weekly time in range comparison enabled during the study.
- For app users, the “Share and Follow” functionality will be discussed and encouraged (i.e. the study participants are able to invite followers to review their glucose levels).

- 1
- 2
- 3 - For participants using the receiver only, the receiver will be downloaded into the CLARITY®
- 4 clinic account at each visit.
- 5
- 6 - For participants using real-time CGM data summary will be downloaded for documentation
- 7 at V3 and V4 (between 36+0 and 38+6) as well as after delivery (VPP1).
- 8
- 9 - The research team will review the CGM in CLARITY® to inform lifestyle and therapy
- 10 recommendations.
- 11
- 12 - The Dexcom G6 system will not be calibrated during the study period.
- 13

### 14 *Control group*

15 The participants of the control group will perform self-monitored blood glucose testing with a  
16 study-provided blood glucose meter, including testing supplies. They will perform capillary  
17 blood glucose monitoring as routinely used for patients with GDM, i.e., at least four capillary  
18 blood glucose values daily including measurements in a fasting state as well as 1h after starting  
19 each meal by using a routinely available blood glucose measurement device. The study  
20 participants will keep a logbook of their glucose values, which will be reviewed by clinicians  
21 from the study team at each visit and used for lifestyle and dietary recommendations as is  
22 routinely done in clinical practice. From V2 to V3 as well as once for ten days between  
23 gestational week 36+0 and 38+6 the control group receive blinded CGM; neither patients nor  
24 the treating medical staff will have access to the data recorded by the CGM sensor at this point  
25 in time. Instead, patients will control blood glucose levels based on SMBG, as is the routine  
26 procedure in current GDM treatment. Otherwise, the control group will receive the same study  
27 assessments as the intervention group. The blinded CGM will be removed and returned to  
28 Dexcom after the 10-day wear period after CGM data is uploaded to CLARITY® by an  
29 unblinded investigator who must not communicate about the results with patients or medical  
30 staff.

31 Each participant of the control group will be assigned a study blood glucose meter to  
32 measure and store their blood glucose values during the study. Therefore, the Contour® Next  
33 One system will be used. The meter has CE Mark clearance and is commercially available in  
34 Europe. Participants will receive an ample supply of meter test materials based on quantities  
35 routinely used. A commercially available desk-top software (Diabass® Pro) used in conjunction  
36 with Contour® Next One system glucose meter for blood glucose monitoring, will be utilized for  
37 downloading the meter data by the sites at V3 and V4 after checking that dates and times are  
38 correct.

39 Blood glucose meters used by the control group will be assessed to establish frequency  
40 of testing (overall and per week) as well as percentage of days with less than four  
41 measurements per day.



### *Analyses of CGM data*

Rt-CGM data allows a detailed examination of the percentage of time in which glucose levels are in target range (time in target) (65 to 140 mg/dl [3.6 to 7.8 mmol/l]), hyperglycaemic episodes (glucose  $\geq$ 140 mg/dl [7.8 mmol/l]) as well as mild (<65 mg/dl [3.6 mmol/l]), moderate ( $\leq$ 54 mg/dl [3.0 mmol/l]) or severe hypoglycemic episodes (requiring third party assistance) and their duration. To this purpose, several indices of the glucose control quality will be calculated, such as GRADE (Glycaemic Risk Assessment Diabetes Equation), some indices of hypoglycaemia and hyperglycaemia, and indices assessing the risk associated to both low and high glycaemic values, such as IGC (Index of Glycaemic Control) and ADRR (Average Daily Risk Range)<sup>23</sup>. Glycaemic variability will also be assessed, which can be quantified by standard deviation of the CGM data, or by more sophisticated indices, such as MAGE (Mean Amplitude Glucose Excursions), CONGA (Continuous Overlapping Net Glycaemic Action), Lability Index<sup>23</sup>, as well as further indices that we developed internally, such as the Shape Index<sup>24</sup>. These will be compared between real-time CGM users and controls (i.e. from data obtained during the blinded CGM wear).

### *Assessment of dietary patterns*

Dietary patterns will be assessed in all patients at V1, VPP1, and VPP2 via a published and validated Food-Frequency-Questionnaire (FFQ) proposed by the German Robert Koch Institute<sup>25</sup>. It was also previously used for the German DEGS project ([www.degs-studie.de](http://www.degs-studie.de)). Information from the FFQ will be analyzed quantitatively or summarized by eating scores proposed in the literature (such as the Healthy Eating Index 2010 or Alternate Healthy Eating Index 2010) reflecting diet quality based on actual guidelines<sup>26,27</sup>. In addition, all patients will be advised to conduct a nutritional protocol (seven days) from V2 to V3 as well as once at V4 (between 36+0 and 38+6 weeks of gestation). In a subgroup (only study site Vienna) dietary intake will also be assessed by performing 24-h-recalls by trained interviewers at V2, V4 and postpartum (VPP2): one face-to-face interview (approx. one hour) and the others as telephone interviews (approx. 30 minutes) during which data are entered simultaneously in GloboDiet. GloboDiet is a computerized program which was developed by the International Agency for Cancer Research (IARC) within the framework of the European Prospective Investigation into Cancer and Nutrition Study (EPIC-Study) for the conduction of harmonized and standardized 24-h-recalls<sup>28</sup>. This open-ended software was used in numerous previous studies and was validated within the EFCOVAL project<sup>29-31</sup>. In brief, GloboDiet is an interview-based dietary assessment instrument that allows obtaining a very detailed description and quantification of foods, recipes, and supplements consumed in the course of the preceding day and thus standardising data within and between countries. Probing questions and entering consumed foods in chronological order support the respondent's memory. The standardized structure prescribes – on the food group level – possibilities of description and quantification of food

1  
2  
3 items to choose from. Quantification of consumed foods is supported by the GloboDiet picture  
4 book that comprises coloured photographs of foods in different portion sizes, photographs of  
5 familiar household measures and schematic displays of forms (e.g. bread, cake). The software  
6 provides an automatic coding of food items and recipe ingredients as well as a rough  
7 calculation of nutrient intake meant for quality control of the interview. GloboDiet is  
8 characterized by the obtained standardization of dietary data within Europe, a large number of  
9 available foods and recipes, and a very detailed description of consumed foods. Currently,  
10 GloboDiet is one of the few dietary instruments providing comparable nutritional data within  
11 Europe. After finalization of the interviews, GloboDiet will be linked to the local nutrition  
12 database – the Bundeslebensmittelschlüssel (BLS) enhanced by the Austrian Nutrition Table  
13 (Österreichische Nährwerttabelle, ÖNWT), containing typical Austrian foods and recipes –  
14 allowing analyses on food ingredients level and to conduct precise energy and risk  
15 assessment.

#### 24 *Assessment of physical activity*

25 Physical activity will be assessed at V1, VPP1, and VPP2 via the International IPAQ (Physical  
26 Activity Questionnaire, long-form). The IPAQ represents a well-accepted, validated instrument  
27 for monitoring population levels of physical activity in different settings and countries<sup>32</sup>. It will  
28 be analyzed via published guidelines for data processing and analysis at the IPAQ homepage  
29 Guidelines for data processing and analysis of the international physical activity questionnaire  
30 (IPAQ)<sup>33</sup>: In short, collected data will be summarized as median MET (metabolic equivalent of  
31 task) minutes per week, representing a continuous score for walking, moderate intensity  
32 activities, vigorous intensity activities and total activities, as recommended. In addition, the  
33 Pregnancy Physical Activity Questionnaire (PPAQ) will be performed to capture information on  
34 physical activity participation and sedentary behaviour during pregnancy<sup>34</sup>.

#### 42 *Assessment of maternal intramyocellular and intrahepatocellular lipids*

43 Intramyocellular (IMCL), and intrahepatocellular lipid contents (HCL) will be measured by using  
44 proton magnetic resonance spectroscopy (<sup>1</sup>H MRS) in a subgroup of 40 patients (20 rt-CGM,  
45 20 SMBG) at V3 and after delivery (VPP2) according to previously described methods<sup>35–37</sup>.  
46 The participants will be studied in supine position within a 3.0 Tesla whole-body magnet  
47 (Siemens or Philips). MRS is a non-invasive technique to evaluate tissue-specific metabolism  
48 and was shown to be safe and well tolerated by pregnant women in previous studies<sup>38,39</sup>.  
49 Patients will be positioned with a left pelvic tilt to avoid pressure on the inferior vena cava  
50 according to other studies in pregnancy<sup>38</sup>. For IMCL measurements, the calf muscle (right leg)  
51 will be positioned in a quadrature bird cage <sup>1</sup>H volume coil. A circular <sup>1</sup>H surface coil will be  
52 positioned over the liver for HCL measurement.

### *Fetal biometry*

Parameters of fetal anthropometry as determined by ultrasound as well as neonatal data including length, weight, gestational age at delivery will be included in the final analysis. A detailed fetal ultrasound examination will be performed at V2 and repeated at V4 (between 36+0 to 38+6 weeks of gestation) to assess fetal growth parameters including head circumference, biparietal diameter and abdominal circumference and abdominal fat thickness, femur length (measured and expressed as standardized gestational age related fetal growth percentiles<sup>40</sup>), amnion fluid index as well as size and location of the placenta and fetal subcutaneous tissue thickness. Moreover, fetal growth symmetry will be assessed by fetal head to abdomen circumference ratio and fetal doppler measurements (mainly umbilical artery and middle cerebral artery<sup>41</sup> and ductus venosus). Furthermore, fetal hepatic size (all hepatic diameters, such as area and volume) and umbilical venous volume flow and an echocardiographic examination of the fetus will be performed in a subgroup (only study site Vienna).

### *Obstetric outcome*

Obstetric outcome (caesarean section, birth injury, preterm birth before 37 completed weeks of gestation) stillbirth, small for gestational age (birth weight <10th pctl), large for gestational age infant (birth weight >90th pctl), shoulder dystocia, admitted to neonatal intensive care unit umbilical cord blood pH, Apgar score) will be recorded immediately after delivery. Length of hospital stay for mothers and offspring as well the duration of high-level neonatal care, respiratory distress, fetal hyperbilirubinemia and neonatal death  $\leq 28$  days will be further assessed. Calculations of age and sex adjusted percentiles will be performed by using international anthropometric standards according to those used in the CONCEPTT study<sup>42</sup>. Neonatal hypoglycaemia is defined as local blood glucose  $\leq 31$  mg/dl [1.7 mmol/l] in the first 24h after delivery and  $\leq 45$  mg/dl [2.5 mmol/l] after the first 24h after delivery or treatment with glucose infusion according to the HAPO study<sup>3</sup>. Additional anthropometric measures of the offspring include head, shoulder and abdominal circumference, length, upper and lower arm and leg circumference and skinfold measurements (suprailiac and subscapular, triceps, quadriceps) in accordance with previous studies<sup>43-45</sup>. Thereby skinfold measurements will be performed by using a validated instrument (Harpender Skinfold Caliper) within 48h after delivery (VPP1).

### *Assessment of cord blood*

17 ml umbilical cord blood (1x8 ml serum and 1x9 ml EDTA) will be taken immediately after delivery to examine cord-blood glucose, insulin and C-peptide.

### *Postpartum OGTT*

The OGTT will be performed at VPP2 (i.e. 8 – 16 weeks after delivery): after collecting blood samples for measurements of glucose (2 ml blood), insulin and C-peptide (3 ml blood) in the

1  
2  
3 fasting state (at least 8 hours), participating females will receive a standardized 300 ml 75g  
4 glucose. Further blood samples of glucose, insulin and C-peptide measurements will be taken  
5 at 30, 60, 90, and 120 minutes after intake of glucose. Insulin sensitivity during the OGTT will  
6 be assessed by the oral glucose insulin sensitivity index (OGIS) according to Mari et al.<sup>46</sup>; this  
7 quantifies dynamic glucose clearance per unit change of insulin. The more recently developed  
8 PREDIM index will be used in addition<sup>47</sup>. The new index provides excellent prediction of clamp-  
9 derived insulin sensitivity from OGTT or meal data. As an approximation for hepatic insulin  
10 resistance the homeostasis model assessment of insulin resistance (HOMA-IR) will be used.  
11 Insulin secretion will be calculated by using the C-peptide deconvolution method<sup>48</sup>.  $\beta$ -cell  
12 function parameters, such as pancreatic glucose sensitivity and rate sensitivity, and  
13 potentiation of insulin secretion, will be computed by mathematical modelling<sup>48</sup>.

#### 21 *Assessment of health-related quality of life and patients' preferences*

22 Health-related quality of life will be elicited using the SF36 and the EQ-5D-5L<sup>49</sup>. It can be  
23 expected that adherence to lifestyle and dietary recommendations are associated with  
24 individual risk preferences. Hence, risk and time preferences will be elicited based on a lottery  
25 approach<sup>50,51</sup>. Participants will be asked to choose between two hypothetical lotteries that differ  
26 in expected outcomes which enables us to derive an individual classification of the risk type,  
27 i.e. risk-averse, risk-neutral or risk-loving individuals. Quality of life as well as risk and time  
28 preferences will be assessed at V1, VPP1, and VPP2. Obstetrical patient's satisfaction will be  
29 additionally assessed at VPP1 by using the Wijma score<sup>52</sup>.

#### 37 *Patient and public involvement*

38 Patients and public were not involved in the study design and will not be involved in the study  
39 conduct, recruitment and dissemination.

#### 44 *Health economic evaluation*

45 For the evaluation of a complex intervention, a health economic evaluation is recommended  
46 as well<sup>53,54</sup>. In this study, a cost-effectiveness (CEA) and a cost-utility analysis (CUA) will be  
47 conducted from the perspective of the health insurance. The effect measure employed in the  
48 CEA will be the primary outcome of the main trial, i.e. avoided cases of LGA newborns. Due  
49 to the short intervention period quality-adjusted life-weeks (QALWs) will be used in the CUA .  
50 QALWs will be calculated based on either the EQ-5D-5L or the SF-6D<sup>55</sup> that derives  
51 preference-based scores from the SF-36. To receive utilities, quality of life will be evaluated by  
52 country-specific population based preferences separately for each country involved in the trial  
53 . Similarly, intervention costs as well as health care costs (direct costs) will be calculated  
54 separately for each country using local prices and adjusted for local purchasing power parity  
55 (PPP). Health care use will be assessed by a validated instrument that is adapted to the  
56  
57  
58  
59  
60

1  
2  
3 requirements of the study<sup>56</sup>. Health care use will comprise resource use dedicated to the  
4 mother but not the child, e.g. clinical visits, outpatient contacts, contacts with therapists, and  
5 medication. Intervention associated costs are costs of devices, software, test strips, and costs  
6 due to education and training of study participants. Since the evaluation covers only the  
7 observation period alongside the trial, costs and effects will not be discounted. Comparing the  
8 outcomes and costs of the intervention group with the outcomes and costs of the control group  
9 yields the incremental cost-effectiveness ratio (ICER: additional cost per additional LGA  
10 newborn avoided) and the cost-utility ratio (ICUR: additional costs per additional QALW  
11 gained).

### 12 13 14 15 16 17 18 19 *Reporting of adverse events*

20 Any (serious) adverse events (AE/SAE) are recorded by the investigator using the specific  
21 AE/SAE sheet of the clinical report form (CRF). All SAE are reported to the responsible ethics  
22 committee within an appropriate time frame.  
23  
24  
25  
26  
27  
28

### 29 **Sample Size and Statistical Analysis**

#### 30 *Sample size*

31 With a sample size of n=338 (169 pregnant women per group) we will be able to detect a  
32 difference between two independent proportions of LGA of 13.7% vs 25.8% (according to the  
33 results of a previous study<sup>10</sup>) with a power of 80% and a two-sided type 1 error of  $\alpha=0.05$   
34 (calculated for Pearson's chi-square test). Considering a drop-out rate of 10% a total sample  
35 size of n=372 (186 women per group) is necessary for this study. This is in line with the sample  
36 size suggested by Kestilä et al.<sup>12</sup>. A blinded sample size review (the proportion of LGA cases  
37 in the sample is reviewed) and adaptation is planned after 50% of the patients have been  
38 investigated. The sample-size calculation was performed by using the software G\*Power  
39 (V3.1.9.2)<sup>57</sup>.  
40  
41  
42  
43  
44  
45  
46

#### 47 *Analysis plan*

48 Analyses should be conducted on the intention-to-treat principle. Categorical variables will be  
49 summarized by counts and proportions; continuous variables data will be summarized by  
50 means and standard deviations (SD) or by median and interquartile range in the case of strong  
51 deviations from the normal distribution. Pearson's chi-square test will be used to compare  
52 differences in the primary outcome (difference in proportion of LGA newborns) and for binary  
53 secondary outcomes (such as caesarean section rate, shoulder dystocia and neonatal  
54 hypoglycaemia). Bernard's test will be used as an alternative if an expected frequency in  
55 contingency tables is equal or less than 5 and the Cochran-Mantel-Haenszel method will be  
56  
57  
58  
59  
60

1  
2  
3 used as sensitivity analysis to adjust for possible center specific effects. Continuous secondary  
4 outcome parameters (such as mean glucose, duration and amount of hyperglycaemia,  
5 glycaemic variability and other rt-CGM measures, postpartum OGTT data, HbA1c,  
6 glycosylated fibronectin or anthropometric data of the newborn) will be compared by student's  
7 t-test. Rank based inference (such as the Brunner-Munzel test<sup>58</sup>) will be used as an alternative  
8 in case of skewed distributed parameters. The association between HbA1c, rt-CGM measures  
9 and delivery and risk of LGA offspring will be assessed by binary logistic regression. There are  
10 many possible objectives for which further exploratory analysis could be performed in this study  
11 (e.g. functional principal components analysis for rt-CGM data). Hence, the present analysis  
12 plan represents only a selection of methods, which will be used for analysing the main  
13 objectives. Risk preferences will be analysed by non-parametric and parametric methods. In  
14 particular, we plan to classify study participants with respect to their risk tolerance (risk-  
15 aversion, risk-neutral, and risk-loving) and deriving CRRA (constant relative risk aversion)  
16 utility functions. Associations between risk preferences and behaviour (dietary patterns and  
17 physical activity) will be investigated. For the health economic evaluation, incremental cost-  
18 effectiveness ratios (ICER: Additional cost per additional LGA newborn avoided) and cost-  
19 utility ratios (ICUR: Additional cost per additional quality-adjusted life year gained) will be  
20 calculated. 95% confidence intervals will be analysed using bootstrap procedures<sup>59</sup>. To  
21 consider uncertainty, cost-acceptability curves will be calculated<sup>60</sup>. A two-sided p-value  $\leq 0.05$   
22 is considered statistically significant. All analyses will be performed by using the statistic  
23 software R and contributing packages<sup>61</sup>. No further adjustment for multiplicity is planned for  
24 this study.  
25  
26  
27  
28  
29  
30  
31  
32  
33  
34  
35  
36  
37  
38  
39

#### 4. Ethics and dissemination

40 This study received ethical approval from the main ethic committee in Vienna (1863/2018).  
41 Ethics approval will be obtained by the local institutional review boards in Basel, Berlin,  
42 Dusseldorf, and Orebro. It was registered under [www.ClinicalTrials.gov](http://www.ClinicalTrials.gov) (NCT03981328). Data  
43 will be presented at international conferences and published in peer-reviewed journals.  
44  
45  
46  
47  
48

#### *Contribution to authorship*

49 EH, KW, JJ, AI, JS, AT, MM, CSG designed the study. MM, AT, AI, MV, JM, CSG, PR will  
50 perform statistical analysis and data interpretation. EH, DE, KW, CK, KW, KS, GYS, IR, KC,  
51 JS, CSG will be responsible for patient management. PH, IH, MR, PR, HF, TF, MV, JM, BW,  
52 MD, GYS, CK, KS will make important contributions and critically reviewed this study protocol.  
53  
54  
55  
56  
57

#### *Acknowledgements*

58 Special thanks to all families who participate in this study.  
59  
60

1  
2  
3  
4  
5 *Funding*

6 This study is supported by Dexcom grant project number OUS-2018-027.  
7  
8

9  
10 *Competing interest statement*

11 The authors declare that there are no further financial or personal relationships with other  
12 people or organizations that could inappropriately influence the work reported or the  
13 conclusions, implications, or opinions stated.  
14  
15  
16  
17  
18  
19  
20  
21  
22  
23  
24  
25  
26  
27  
28  
29  
30  
31  
32  
33  
34  
35  
36  
37  
38  
39  
40  
41  
42  
43  
44  
45  
46  
47  
48  
49  
50  
51  
52  
53  
54  
55  
56  
57  
58  
59  
60

For peer review only

## 5 References

1. Catalano, P. M. & Shankar, K. Obesity and pregnancy: mechanisms of short term and long term adverse consequences for mother and child. *BMJ* **356**, j1 (2017).
2. Sacks, D. A. *et al.* Frequency of Gestational Diabetes Mellitus at Collaborating Centers Based on IADPSG Consensus Panel-Recommended Criteria: The Hyperglycemia and Adverse Pregnancy Outcome (HAPO) Study. *Diabetes Care* **35**, 526–528 (2012).
3. Hyperglycemia and Adverse Pregnancy Outcomes. *N. Engl. J. Med.* **358**, 1991–2002 (2008).
4. Dabelea, D. *et al.* Intrauterine exposure to diabetes conveys risks for type 2 diabetes and obesity: a study of discordant sibships. *Diabetes* **49**, 2208–2211 (2000).
5. Crowther, C. A. *et al.* Effect of Treatment of Gestational Diabetes Mellitus on Pregnancy Outcomes. *N. Engl. J. Med.* **352**, 2477–2486 (2005).
6. Landon, M. B. *et al.* A Multicenter, Randomized Trial of Treatment for Mild Gestational Diabetes. *N. Engl. J. Med.* **361**, 1339–1348 (2009).
7. Horvath, K. *et al.* Effects of treatment in women with gestational diabetes mellitus: systematic review and meta-analysis. *BMJ* **340**, c1395–c1395 (2010).
8. Klonoff, D. C., Ahn, D. & Drincic, A. Continuous glucose monitoring: A review of the technology and clinical use. *Diabetes Res. Clin. Pract.* **133**, 178–192 (2017).
9. Liebl, A. *et al.* Continuous Glucose Monitoring: Evidence and Consensus Statement for Clinical Use. *J. Diabetes Sci. Technol.* **7**, 500–519 (2013).
10. Yu, F. *et al.* Continuous Glucose Monitoring Effects on Maternal Glycemic Control and Pregnancy Outcomes in Patients With Gestational Diabetes Mellitus: A Prospective Cohort Study. *J. Clin. Endocrinol. Metab.* **99**, 4674–4682 (2014).
11. Chen, R. *et al.* Continuous glucose monitoring for the evaluation and improved control of gestational diabetes mellitus. *J. Matern. Fetal Neonatal Med.* **14**, 256–260 (2003).
12. Kestilä, K. K., Ekblad, U. U. & Rönnemaa, T. Continuous glucose monitoring versus self-monitoring of blood glucose in the treatment of gestational diabetes mellitus. *Diabetes Res. Clin. Pract.* **77**, 174–179 (2007).
13. Wei, Q. *et al.* Effect of a CGMS and SMBG on Maternal and Neonatal Outcomes in Gestational Diabetes Mellitus: a Randomized Controlled Trial. *Sci. Rep.* **6**, (2016).
14. Ahn, D., Pettus, J. & Edelman, S. Unblinded CGM Should Replace Blinded CGM in the Clinical Management of Diabetes. *J. Diabetes Sci. Technol.* **10**, 793–798 (2016).



- 1  
2  
3 15. Feig, D. S. *et al.* Continuous glucose monitoring in pregnant women with type 1 diabetes  
4 (CONCEPTT): a multicentre international randomised controlled trial. *The Lancet* (2017).  
5  
6 doi:10.1016/S0140-6736(17)32400-5  
7
- 8  
9 16. Alfadhli, E., Osman, E. & Basri, T. Use of a real time continuous glucose monitoring system as an  
10 educational tool for patients with gestational diabetes. *Diabetol. Metab. Syndr.* **8**, (2016).  
11
- 12  
13 17. Polsky, S. & Garcetti, R. CGM, Pregnancy, and Remote Monitoring. *Diabetes Technol. Ther.* **19**,  
14 S-49-S-59 (2017).  
15
- 16  
17 18. Cosson, E. *et al.* Poor Reliability and Poor Adherence to Self-Monitoring of Blood Glucose Are  
18 Common in Women With Gestational Diabetes Mellitus and May Be Associated With Poor  
19 Pregnancy Outcomes. *Diabetes Care* **40**, 1181–1186 (2017).  
20
- 21  
22 19. American Diabetes Association. 2. Classification and Diagnosis of Diabetes: Standards of Medical  
23 Care in Diabetes-2018. *Diabetes Care* **41**, S13–S27 (2018).  
24
- 25  
26 20. International Association of Diabetes and Pregnancy Study Groups Consensus Panel.  
27 International Association of Diabetes and Pregnancy Study Groups Recommendations on the  
28 Diagnosis and Classification of Hyperglycemia in Pregnancy. *Diabetes Care* **33**, 676–682 (2010).  
29
- 30  
31 21. American Diabetes Association. 13. Management of Diabetes in Pregnancy: *Standards of Medical*  
32 *Care in Diabetes—2018*. *Diabetes Care* **41**, S137–S143 (2018).  
33
- 34  
35 22. Pocock, S. J. & Simon, R. Sequential treatment assignment with balancing for prognostic factors  
36 in the controlled clinical trial. *Biometrics* **31**, 103–115 (1975).  
37
- 38  
39 23. Rodbard, D. Interpretation of Continuous Glucose Monitoring Data: Glycemic Variability and  
40 Quality of Glycemic Control. *Diabetes Technol. Ther.* **11**, S-55-S-67 (2009).  
41
- 42  
43 24. Tura, A. *et al.* Shape of glucose, insulin, C-peptide curves during a 3-h oral glucose tolerance test:  
44 any relationship with the degree of glucose tolerance? *Am. J. Physiol.-Regul. Integr. Comp.*  
45 *Physiol.* **300**, R941–R948 (2011).  
46
- 47  
48 25. Haftenberger, M. *et al.* Relative validation of a food frequency questionnaire for national health  
49 and nutrition monitoring. *Nutr. J.* **9**, (2010).  
50
- 51  
52 26. Guenther, P. M. *et al.* Update of the Healthy Eating Index: HEI-2010. *J. Acad. Nutr. Diet.* **113**,  
53 569–580 (2013).  
54
- 55  
56 27. Chiuve, S. E. *et al.* Alternative Dietary Indices Both Strongly Predict Risk of Chronic Disease. *J.*  
57 *Nutr.* **142**, 1009–1018 (2012).  
58  
59  
60

- 1
- 2
- 3 28. Slimani, N. *et al.* Standardization of the 24-hour diet recall calibration method used in the
- 4 european prospective investigation into cancer and nutrition (EPIC): general concepts and
- 5 preliminary results. *Eur. J. Clin. Nutr.* **54**, 900–917 (2000).
- 6
- 7
- 8
- 9 29. Crispim, S. P. *et al.* Two non-consecutive 24 h recalls using EPIC-Soft software are sufficiently
- 10 valid for comparing protein and potassium intake between five European centres – results from
- 11 the European Food Consumption Validation (EFCOVAL) study. *Br. J. Nutr.* **105**, 447–458 (2011).
- 12
- 13
- 14 30. on behalf of the EFCOVAL Consortium *et al.* The European Food Consumption Validation Project:
- 15 conclusions and recommendations. *Eur. J. Clin. Nutr.* **65**, S102–S107 (2011).
- 16
- 17
- 18 31. on behalf of the EFCOVAL Consortium *et al.* The standardized computerized 24-h dietary recall
- 19 method EPIC-Soft adapted for pan-European dietary monitoring. *Eur. J. Clin. Nutr.* **65**, S5–S15
- 20 (2011).
- 21
- 22
- 23
- 24 32. Craig, C. L. *et al.* International physical activity questionnaire: 12-country reliability and validity.
- 25 *Med. Sci. Sports Exerc.* **35**, 1381–1395 (2003).
- 26
- 27
- 28 33. Committee, I. R. *Guidelines for data processing and analysis of the International Physical Activity*
- 29 *Questionnaire (IPAQ)–short and long forms.* 17: p. 2008. (2005).
- 30
- 31
- 32 34. Chasan-Taber, L. *et al.* Development and validation of a Pregnancy Physical Activity
- 33 Questionnaire. *Med. Sci. Sports Exerc.* **36**, 1750–1760 (2004).
- 34
- 35
- 36 35. Krssak, M. & Roden, M. The role of lipid accumulation in liver and muscle for insulin resistance
- 37 and type 2 diabetes mellitus in humans. *Rev. Endocr. Metab. Disord.* **5**, 127–134 (2004).
- 38
- 39
- 40 36. Prikoszovich, T. *et al.* Body and Liver Fat Mass Rather Than Muscle Mitochondrial Function
- 41 Determine Glucose Metabolism in Women With a History of Gestational Diabetes Mellitus.
- 42 *Diabetes Care* **34**, 430–436 (2011).
- 43
- 44
- 45 37. Livingstone, R. S. *et al.* Initial clinical application of modified Dixon with flexible echo times:
- 46 hepatic and pancreatic fat assessments in comparison with 1H MRS. *Magn. Reson. Mater. Phys.*
- 47 *Biol. Med.* **27**, 397–405 (2014).
- 48
- 49
- 50 38. Hodson, K. *et al.* Liver triacylglycerol content and gestational diabetes: effects of moderate energy
- 51 restriction. *Diabetologia* **60**, 306–313 (2017).
- 52
- 53
- 54 39. Hodson, K. *et al.* Mechanism of insulin resistance in normal pregnancy. *Horm. Metab. Res. Horm.*
- 55 *Stoffwechselforschung Horm. Metab.* **45**, 567–571 (2013).
- 56
- 57
- 58 40. Hadlock, F. P., Deter, R. L., Harrist, R. B. & Park, S. K. Estimating fetal age: computer-assisted
- 59 analysis of multiple fetal growth parameters. *Radiology* **152**, 497–501 (1984).
- 60

- 1
- 2
- 3 41. Salomon, L. J. *et al.* Practice guidelines for performance of the routine mid-trimester fetal
- 4 ultrasound scan. *Ultrasound Obstet. Gynecol. Off. J. Int. Soc. Ultrasound Obstet. Gynecol.* **37**,
- 5 116–126 (2011).
- 6
- 7
- 8
- 9 42. Gestation Network. Gestation Network. (2018). Available at:
- 10 <https://www.gestation.net/cc/about.htm>.
- 11
- 12
- 13 43. Brans, Y. W., Sumners, J. E., Dweck, H. S. & Cassady, G. A Noninvasive Approach to Body
- 14 Composition in the Neonate: Dynamic Skinfold Measurements. *Pediatr. Res.* **8**, 215–222 (1974).
- 15
- 16 44. Dauncey, M. J., Gandy, G. & Gairdner, D. Assessment of total body fat in infancy from skinfold
- 17 thickness measurements. *Arch. Dis. Child.* **52**, 223–227 (1977).
- 18
- 19
- 20 45. Jelsma, J. G. *et al.* DALI: Vitamin D and lifestyle intervention for gestational diabetes mellitus
- 21 (GDM) prevention: an European multicentre, randomised trial – study protocol. *BMC Pregnancy*
- 22 *Childbirth* **13**, (2013).
- 23
- 24
- 25
- 26 46. Mari, A., Pacini, G., Murphy, E., Ludvik, B. & Nolan, J. J. A Model-Based Method for Assessing
- 27 Insulin Sensitivity From the Oral Glucose Tolerance Test. *Diabetes Care* **24**, 539–548 (2001).
- 28
- 29
- 30 47. Tura, A. *et al.* Prediction of clamp-derived insulin sensitivity from the oral glucose insulin
- 31 sensitivity index. *Diabetologia* **61**, 1135–1141 (2018).
- 32
- 33
- 34 48. Mari, A., Tura, A., Gastaldelli, A. & Ferrannini, E. Assessing insulin secretion by modeling in
- 35 multiple-meal tests: role of potentiation. *Diabetes* **51 Suppl 1**, S221-226 (2002).
- 36
- 37
- 38 49. Hinz, A., Kohlmann, T., Stöbel-Richter, Y., Zenger, M. & Brähler, E. The quality of life
- 39 questionnaire EQ-5D-5L: psychometric properties and normative values for the general German
- 40 population. *Qual. Life Res. Int. J. Qual. Life Asp. Treat. Care Rehabil.* **23**, 443–447 (2014).
- 41
- 42
- 43 50. Holt, C. A. & Laury, S. K. Risk Aversion and Incentive Effects. *Am. Econ. Rev.* **92**, 1644–1655
- 44 (2002).
- 45
- 46
- 47 51. Andersen, S., Harrison, G. W., Lau, M. I. & Rutström, E. E. Eliciting Risk and Time Preferences.
- 48 *Econometrica* **76**, 583–618 (2008).
- 49
- 50
- 51 52. Wijma, K., Wijma, B. & Zar, M. Psychometric aspects of the W-DEQ; a new questionnaire for the
- 52 measurement of fear of childbirth. *J. Psychosom. Obstet. Gynaecol.* **19**, 84–97 (1998).
- 53
- 54 53. Craig, P. *et al.* Developing and evaluating complex interventions: the new Medical Research
- 55 Council guidance. *BMJ* a1655 (2008). doi:10.1136/bmj.a1655
- 56
- 57
- 58 54. Drummond, M. F. *Methods for the economic evaluation of health care programmes.* (Oxford
- 59 University Press (Oxford medical publications), 2005).
- 60

- 1  
2  
3 55. Brazier, J., Roberts, J. & Deverill, M. The estimation of a preference-based measure of health  
4 from the SF-36. *J. Health Econ.* **21**, 271–292 (2002).  
5  
6  
7 56. Chernyak, N., Ernsting, C. & Icks, A. Pre-test of questions on health-related resource use and  
8 expenditure, using behaviour coding and cognitive interviewing techniques. *BMC Health Serv.*  
9 *Res.* **12**, (2012).  
10  
11  
12 57. Faul, F., Erdfelder, E., Lang, A.-G. & Buchner, A. G\*Power 3: a flexible statistical power analysis  
13 program for the social, behavioral, and biomedical sciences. *Behav. Res. Methods* **39**, 175–191  
14 (2007).  
15  
16  
17 58. Brunner, E. & Munzel, U. The Nonparametric Behrens-Fisher Problem: Asymptotic Theory and a  
18 Small-Sample Approximation. *Biom. J.* **42**, 17–25 (2000).  
19  
20  
21 59. Briggs, A. H., Wonderling, D. E. & Mooney, C. Z. Pulling cost-effectiveness analysis up by its  
22 bootstraps: a non-parametric approach to confidence interval estimation. *Health Econ.* **6**, 327–340  
23 (1997).  
24  
25  
26 60. Fenwick, E., O'Brien, B. J. & Briggs, A. Cost-effectiveness acceptability curves– facts, fallacies  
27 and frequently asked questions. *Health Econ.* **13**, 405–415 (2004).  
28  
29  
30 61. R Core Team. *R: A language and environment for statistical computing.* (2017).  
31  
32  
33  
34  
35  
36  
37  
38  
39  
40  
41  
42  
43  
44  
45  
46  
47  
48  
49  
50  
51  
52  
53  
54  
55  
56  
57  
58  
59  
60

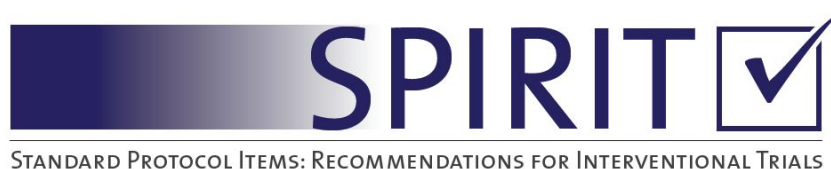

STANDARD PROTOCOL ITEMS: RECOMMENDATIONS FOR INTERVENTIONAL TRIALS

SPIRIT 2013 Checklist: Recommended items to address in a clinical trial protocol and related documents\*

| Section/item                      | Item No | Description                                                                                                                                                                                                                                                                              |
|-----------------------------------|---------|------------------------------------------------------------------------------------------------------------------------------------------------------------------------------------------------------------------------------------------------------------------------------------------|
| <b>Administrative information</b> |         |                                                                                                                                                                                                                                                                                          |
| Title                             | 1       | Descriptive title identifying the study design, population, interventions, and, if applicable, trial acronym → <a href="#">title page</a>                                                                                                                                                |
| Trial registration                | 2a      | Trial identifier and registry name. If not yet registered, name of intended registry → <a href="#">page 3</a>                                                                                                                                                                            |
|                                   | 2b      | All items from the World Health Organization Trial Registration Data Set                                                                                                                                                                                                                 |
| Protocol version                  | 3       | Date and version identifier → only in original protocol                                                                                                                                                                                                                                  |
| Funding                           | 4       | <a href="#">Sources and types of financial, material, and other support → page 18</a>                                                                                                                                                                                                    |
| Roles and responsibilities        | 5a      | Names, affiliations, and roles of protocol contributors → <a href="#">page 2</a>                                                                                                                                                                                                         |
|                                   | 5b      | Name and contact information for the trial sponsor → <a href="#">page 1/18</a>                                                                                                                                                                                                           |
|                                   | 5c      | Role of study sponsor and funders, if any, in study design; collection, management, analysis, and interpretation of data; writing of the report; and the decision to submit the report for publication, including whether they will have ultimate authority over any of these activities |
|                                   | 5d      | Composition, roles, and responsibilities of the coordinating centre, steering committee, endpoint adjudication committee, data management team, and other individuals or groups overseeing the trial, if applicable (see Item 21a for data monitoring committee)                         |
| <b>Introduction</b>               |         |                                                                                                                                                                                                                                                                                          |
| Background and rationale          | 6a      | Description of research question and justification for undertaking the trial, including summary of relevant studies (published and unpublished) examining benefits and harms for each intervention → <a href="#">page 5-7 (Introduction)</a>                                             |
|                                   | 6b      | Explanation for choice of comparators                                                                                                                                                                                                                                                    |
| Objectives                        | 7       | Specific objectives or hypotheses → <a href="#">page 7 (Hypotheses)</a>                                                                                                                                                                                                                  |

1  
2  
3  
4  
5  
6  
7  
8  
9  
10  
11  
12  
13  
14  
15  
16  
17  
18  
19  
20  
21  
22  
23  
24  
25  
26  
27  
28  
29  
30  
31  
32  
33  
34  
35  
36  
37  
38  
39  
40  
41  
42  
43  
44  
45  
46  
47  
48  
49  
50  
51  
52  
53  
54  
55  
56  
57  
58  
59  
60

Trial design 8 Description of trial design including type of trial (eg, parallel group, crossover, factorial, single group), allocation ratio, and framework (eg, superiority, equivalence, noninferiority, exploratory) → [see Title](#)

### Methods: Participants, interventions, and outcomes

Study setting 9 Description of study settings (eg, community clinic, academic hospital) and list of countries where data will be collected. Reference to where list of study sites can be obtained → [page 8](#)

Eligibility criteria 10 Inclusion and exclusion criteria for participants. If applicable, eligibility criteria for study centres and individuals who will perform the interventions (eg, surgeons, psychotherapists) → [page 8 \(Eligibility criteria\)](#)

Interventions 11a Interventions for each group with sufficient detail to allow replication, including how and when they will be administered → [page 8/9 \(Study procedure\)](#)

11b Criteria for discontinuing or modifying allocated interventions for a given trial participant (eg, drug dose change in response to harms, participant request, or improving/worsening disease) → [not applicable](#)

11c Strategies to improve adherence to intervention protocols, and any procedures for monitoring adherence (eg, drug tablet return, laboratory tests) → [not applicable](#)

11d Relevant concomitant care and interventions that are permitted or prohibited during the trial → [not applicable](#)

Outcomes 12 Primary, secondary, and other outcomes, including the specific measurement variable (eg, systolic blood pressure), analysis metric (eg, change from baseline, final value, time to event), method of aggregation (eg, median, proportion), and time point for each outcome. Explanation of the clinical relevance of chosen efficacy and harm outcomes is strongly recommended → [page 6 \(Study outcomes\)](#)

Participant timeline 13 Time schedule of enrolment, interventions (including any run-ins and washouts), assessments, and visits for participants. A schematic diagram is highly recommended (see Figure) → [page 8/9](#)

Sample size 14 Estimated number of participants needed to achieve study objectives and how it was determined, including clinical and statistical assumptions supporting any sample size calculations → [page 17/18 \(Sample size justification\)](#)

Recruitment 15 Strategies for achieving adequate participant enrolment to reach target sample size

**Methods: Assignment of interventions (for controlled trials)** → [page 9](#)

## Allocation:

- 1  
2  
3  
4      Sequence      16a      Method of generating the allocation sequence (eg, computer-  
5      generation                generated random numbers), and list of any factors for stratification.  
6                          To reduce predictability of a random sequence, details of any planned  
7                          restriction (eg, blocking) should be provided in a separate document  
8                          that is unavailable to those who enrol participants or assign  
9                          interventions  
10  
11  
12      Allocation      16b      Mechanism of implementing the allocation sequence (eg, central  
13      concealment                telephone; sequentially numbered, opaque, sealed envelopes),  
14      mechanism                describing any steps to conceal the sequence until interventions are  
15                          assigned  
16  
17      Implementation 16c      Who will generate the allocation sequence, who will enrol participants,  
18                          and who will assign participants to interventions  
19  
20  
21      Blinding      17a      Who will be blinded after assignment to interventions (eg, trial  
22      (masking)                participants, care providers, outcome assessors, data analysts), and  
23                          how → not applicable  
24  
25                17b      If blinded, circumstances under which unblinding is permissible, and  
26                          procedure for revealing a participant's allocated intervention during  
27                          the trial → not applicable  
28  
29

**Methods: Data collection, management, and analysis**

- 30  
31  
32      Data collection      18a      Plans for assessment and collection of outcome, baseline, and other  
33      methods                trial data, including any related processes to promote data quality (eg,  
34                          duplicate measurements, training of assessors) and a description of  
35                          study instruments (eg, questionnaires, laboratory tests) along with  
36                          their reliability and validity, if known. Reference to where data  
37                          collection forms can be found, if not in the protocol  
38  
39                18b      Plans to promote participant retention and complete follow-up,  
40                          including list of any outcome data to be collected for participants who  
41                          discontinue or deviate from intervention protocols  
42  
43  
44      Data      19      Plans for data entry, coding, security, and storage, including any  
45      management                related processes to promote data quality (eg, double data entry;  
46                          range checks for data values). Reference to where details of data  
47                          management procedures can be found, if not in the protocol  
48  
49  
50      Statistical      20a      Statistical methods for analysing primary and secondary outcomes.  
51      methods                Reference to where other details of the statistical analysis plan can be  
52                          found, if not in the protocol → page 13-15 (Study analysis plan)  
53  
54                20b      Methods for any additional analyses (eg, subgroup and adjusted  
55                          analyses) → page 15-19 (Other study measurements)  
56  
57  
58  
59  
60

- 1  
2  
3  
4  
5  
6  
7  
8  
9  
10  
11  
12  
13  
14  
15  
16  
17  
18  
19  
20  
21  
22  
23  
24  
25  
26  
27  
28  
29  
30  
31  
32  
33  
34  
35  
36  
37  
38  
39  
40  
41  
42  
43  
44  
45  
46  
47  
48  
49  
50  
51  
52  
53  
54  
55  
56  
57  
58  
59  
60
- 20c Definition of analysis population relating to protocol non-adherence (eg, as randomised analysis), and any statistical methods to handle missing data (eg, multiple imputation)

### Methods: Monitoring

- Data monitoring 21a Composition of data monitoring committee (DMC); summary of its role and reporting structure; statement of whether it is independent from the sponsor and competing interests; and reference to where further details about its charter can be found, if not in the protocol. Alternatively, an explanation of why a DMC is not needed
- 21b Description of any interim analyses and stopping guidelines, including who will have access to these interim results and make the final decision to terminate the trial
- Harms 22 Plans for collecting, assessing, reporting, and managing solicited and spontaneously reported adverse events and other unintended effects of trial interventions or trial conduct → see Reporting of adverse events, page 17
- Auditing 23 Frequency and procedures for auditing trial conduct, if any, and whether the process will be independent from investigators and the sponsor

### Ethics and dissemination

- Research ethics approval 24 Plans for seeking research ethics committee/institutional review board (REC/IRB) approval → page 8 (Study settings/design)
- Protocol amendments 25 Plans for communicating important protocol modifications (eg, changes to eligibility criteria, outcomes, analyses) to relevant parties (eg, investigators, REC/IRBs, trial participants, trial registries, journals, regulators)
- Consent or assent 26a Who will obtain informed consent or assent from potential trial participants or authorised surrogates, and how (see Item 32)
- 26b Additional consent provisions for collection and use of participant data and biological specimens in ancillary studies, if applicable
- Confidentiality 27 How personal information about potential and enrolled participants will be collected, shared, and maintained in order to protect confidentiality before, during, and after the trial → page 9 (Data recording)
- Declaration of interests 28 Financial and other competing interests for principal investigators for the overall trial and each study site → (page 3 (Conflict of interest))
- Access to data 29 Statement of who will have access to the final trial dataset, and disclosure of contractual agreements that limit such access for investigators



|    |                   |     |                                                                              |
|----|-------------------|-----|------------------------------------------------------------------------------|
| 1  |                   |     |                                                                              |
| 2  | Ancillary and     | 30  | Provisions, if any, for ancillary and post-trial care, and for               |
| 3  | post-trial care   |     | compensation to those who suffer harm from trial participation               |
| 4  |                   |     |                                                                              |
| 5  | Dissemination     | 31a | Plans for investigators and sponsor to communicate trial results to          |
| 6  | policy            |     | participants, healthcare professionals, the public, and other relevant       |
| 7  |                   |     | groups (eg, via publication, reporting in results databases, or other        |
| 8  |                   |     | data sharing arrangements), including any publication restrictions →         |
| 9  |                   |     | <b>page 18</b>                                                               |
| 10 |                   |     |                                                                              |
| 11 |                   | 31b | Authorship eligibility guidelines and any intended use of professional       |
| 12 |                   |     | writers                                                                      |
| 13 |                   |     |                                                                              |
| 14 |                   | 31c | Plans, if any, for granting public access to the full protocol, participant- |
| 15 |                   |     | level dataset, and statistical code                                          |
| 16 |                   |     |                                                                              |
| 17 |                   |     |                                                                              |
| 18 |                   |     |                                                                              |
| 19 | <b>Appendices</b> |     |                                                                              |
| 20 |                   |     |                                                                              |
| 21 | Informed consent  | 32  | Model consent form and other related documentation given to                  |
| 22 | materials         |     | participants and authorised surrogates                                       |
| 23 |                   |     |                                                                              |
| 24 | Biological        | 33  | Plans for collection, laboratory evaluation, and storage of biological       |
| 25 | specimens         |     | specimens for genetic or molecular analysis in the current trial and for     |
| 26 |                   |     | future use in ancillary studies, if applicable                               |
| 27 |                   |     |                                                                              |

---

\*It is strongly recommended that this checklist be read in conjunction with the SPIRIT 2013 Explanation & Elaboration for important clarification on the items. Amendments to the protocol should be tracked and dated. The SPIRIT checklist is copyrighted by the SPIRIT Group under the Creative Commons "[Attribution-NonCommercial-NoDerivs 3.0 Unported](https://creativecommons.org/licenses/by-nc-nd/3.0/)" license.

# BMJ Open

## The Effectiveness of Real-Time Continuous Glucose Monitoring to Improve Glycaemic Control and Pregnancy Outcome in Patients with Gestational Diabetes Mellitus: A Study Protocol for a Randomised Controlled Trial.

|                               |                                                                                                                                                                                                                                                                                                                                                                                                                                                                                                                                                                                                                                                                                                                                                                                                                                                                                                                                                                                                                                                                                                                                                                                                                                                                                                                                                                                                                                                                                                                                                                                                                                                                                                                                                                                                                                                                                                                                                                                                                                                                                                                                                                                                                                                                                                                                                                                                                                                                                     |
|-------------------------------|-------------------------------------------------------------------------------------------------------------------------------------------------------------------------------------------------------------------------------------------------------------------------------------------------------------------------------------------------------------------------------------------------------------------------------------------------------------------------------------------------------------------------------------------------------------------------------------------------------------------------------------------------------------------------------------------------------------------------------------------------------------------------------------------------------------------------------------------------------------------------------------------------------------------------------------------------------------------------------------------------------------------------------------------------------------------------------------------------------------------------------------------------------------------------------------------------------------------------------------------------------------------------------------------------------------------------------------------------------------------------------------------------------------------------------------------------------------------------------------------------------------------------------------------------------------------------------------------------------------------------------------------------------------------------------------------------------------------------------------------------------------------------------------------------------------------------------------------------------------------------------------------------------------------------------------------------------------------------------------------------------------------------------------------------------------------------------------------------------------------------------------------------------------------------------------------------------------------------------------------------------------------------------------------------------------------------------------------------------------------------------------------------------------------------------------------------------------------------------------|
| Journal:                      | <i>BMJ Open</i>                                                                                                                                                                                                                                                                                                                                                                                                                                                                                                                                                                                                                                                                                                                                                                                                                                                                                                                                                                                                                                                                                                                                                                                                                                                                                                                                                                                                                                                                                                                                                                                                                                                                                                                                                                                                                                                                                                                                                                                                                                                                                                                                                                                                                                                                                                                                                                                                                                                                     |
| Manuscript ID                 | bmjopen-2020-040498.R1                                                                                                                                                                                                                                                                                                                                                                                                                                                                                                                                                                                                                                                                                                                                                                                                                                                                                                                                                                                                                                                                                                                                                                                                                                                                                                                                                                                                                                                                                                                                                                                                                                                                                                                                                                                                                                                                                                                                                                                                                                                                                                                                                                                                                                                                                                                                                                                                                                                              |
| Article Type:                 | Protocol                                                                                                                                                                                                                                                                                                                                                                                                                                                                                                                                                                                                                                                                                                                                                                                                                                                                                                                                                                                                                                                                                                                                                                                                                                                                                                                                                                                                                                                                                                                                                                                                                                                                                                                                                                                                                                                                                                                                                                                                                                                                                                                                                                                                                                                                                                                                                                                                                                                                            |
| Date Submitted by the Author: | 12-Aug-2020                                                                                                                                                                                                                                                                                                                                                                                                                                                                                                                                                                                                                                                                                                                                                                                                                                                                                                                                                                                                                                                                                                                                                                                                                                                                                                                                                                                                                                                                                                                                                                                                                                                                                                                                                                                                                                                                                                                                                                                                                                                                                                                                                                                                                                                                                                                                                                                                                                                                         |
| Complete List of Authors:     | <p>Huhn, Evelyn; Frauenklinik Universitatsspital Basel, Obstetrics and Gynaecology</p> <p>Linder, Tina; Medical University of Vienna Department of Obstetrics and Gynaecology, Department of Obstetrics and Feto-maternal Medicine</p> <p>Eppel, Daniel; Medical University of Vienna Department of Obstetrics and Gynaecology, Department of Obstetrics and Feto-maternal Medicine</p> <p>Weißhaupt, Karen; Charite Universitätsmedizin Berlin, Clinic of Obstetrics, Charité-Universitätsmedizin Berlin, Corporate Member of Freie Universität Berlin, Humboldt-Universität zu Berlin, and Berlin Institute of Health, Campus Virchow-Klinikum</p> <p>Klapp, Christine; Charite Universitätsmedizin Berlin, Clinic of Obstetrics, Charité-Universitätsmedizin Berlin, Corporate Member of Freie Universität Berlin, Humboldt-Universität zu Berlin, and Berlin Institute of Health, Campus Virchow-Klinikum</p> <p>Schellong, Karen; Charite Universitätsmedizin Berlin, Clinic of Obstetrics, Charité-Universitätsmedizin Berlin, Corporate Member of Freie Universität Berlin, Humboldt-Universität zu Berlin, and Berlin Institute of Health, Campus Virchow-Klinikum</p> <p>Henrich, Wolfgang; Charite Universitätsmedizin Berlin, Clinic of Obstetrics, Charité-Universitätsmedizin Berlin, Corporate Member of Freie Universität Berlin, Humboldt-Universität zu Berlin, and Berlin Institute of Health, Campus Virchow-Klinikum</p> <p>Yerlikaya-Schatten, Gülen; Medical University of Vienna Department of Obstetrics and Gynaecology, Department of Obstetrics and Feto-maternal Medicine</p> <p>Rosicky, Ingo; Medical University of Vienna Department of Obstetrics and Gynaecology, Department of Obstetrics and Feto-maternal Medicine</p> <p>Husslein, Peter; Medizinische Universität Wien, Obstetrics and Gynaecology, Division of Obstetrics and feto-maternal Medicine</p> <p>Chalubinski, Kinga; Medical University of Vienna Department of Obstetrics and Gynaecology, Department of Obstetrics and Feto-maternal Medicine</p> <p>Mittlbock, Martina; Medical University of Vienna Department of Obstetrics and Gynaecology, Center of Medical Statistics, Informatics, and Intelligent Systems, Section for Clinical Biometrics</p> <p>Rust, Petra; University of Vienna, Department of Nutritional Sciences</p> <p>Hoesli, Irene; University Hospital, University Basel, Obstetrics</p> <p>Winzeler, Bettina; University Hospital Basel, Department of</p> |

|                                 |                                                                                                                                                                                                                                                                                                                                                                                                                                                                                                                                                                                                                                                                                                                                                                                                                                                                                                                                                                                                                                                                                                                                                                                                                                                                                                                                                                                                                                                                                                                                                                                                                                                                                                                              |
|---------------------------------|------------------------------------------------------------------------------------------------------------------------------------------------------------------------------------------------------------------------------------------------------------------------------------------------------------------------------------------------------------------------------------------------------------------------------------------------------------------------------------------------------------------------------------------------------------------------------------------------------------------------------------------------------------------------------------------------------------------------------------------------------------------------------------------------------------------------------------------------------------------------------------------------------------------------------------------------------------------------------------------------------------------------------------------------------------------------------------------------------------------------------------------------------------------------------------------------------------------------------------------------------------------------------------------------------------------------------------------------------------------------------------------------------------------------------------------------------------------------------------------------------------------------------------------------------------------------------------------------------------------------------------------------------------------------------------------------------------------------------|
|                                 | <p>Endocrinology and Diabetology<br/> Jendle, Johan ; Orebro Universitet, Institution of Medical Sciences<br/> Fehm, T; University Hospital Düsseldorf, Department of Obstetrics and Gynaecology, Medical Faculty, Heinrich-Heine University Düsseldorf,<br/> Icks, Andrea; Heinrich-Heine-Universität Dusseldorf, Institute of Health Services Research and Health Economics; German Diabetes Center at the Heinrich-Heine-University, Leibniz Center for Diabetes Research, Paul Langerhans Group for Health Services Research and Health Economics<br/> Vomhof, Markus; Deutsches Diabetes-Zentrum Leibniz-Zentrum für Diabetes-Forschung, Institute for Health Services Research and Health Economics; Universitätsklinikum Düsseldorf Centre for Health and Society, Institute for Health Services Research and Health Economics<br/> Greiner, Gregory; Deutsches Diabetes-Zentrum Leibniz-Zentrum für Diabetes-Forschung, Institute for Health Services Research and Health Economics, German Diabetes Center at Heinrich-Heine University Düsseldorf, Leibniz Institute for Diabetes Research, Düsseldorf, Germany<br/> Szendrödi, Julia; Deutsches Diabetes-Zentrum Leibniz-Zentrum für Diabetes-Forschung, Institute for Health Services Research and Health Economics<br/> Roden, Michael; Universitätsklinikum Düsseldorf Centre for Health and Society, Institute for Health Services Research and Health Economics<br/> Tura, Andrea; Institute of Molecular Science and Technologies Padova Branch National Research Council, Metabolic Unit, Institute of Neuroscience<br/> Göbl, Christian; Medizinische Universität Wien, Obstetrics and Gynaecology, Division of Obstetrics and feto-maternal Medicine</p> |
| <b>Primary Subject Heading</b>: | Diabetes and endocrinology                                                                                                                                                                                                                                                                                                                                                                                                                                                                                                                                                                                                                                                                                                                                                                                                                                                                                                                                                                                                                                                                                                                                                                                                                                                                                                                                                                                                                                                                                                                                                                                                                                                                                                   |
| Secondary Subject Heading:      | Obstetrics and gynaecology                                                                                                                                                                                                                                                                                                                                                                                                                                                                                                                                                                                                                                                                                                                                                                                                                                                                                                                                                                                                                                                                                                                                                                                                                                                                                                                                                                                                                                                                                                                                                                                                                                                                                                   |
| Keywords:                       | Diabetes in pregnancy < DIABETES & ENDOCRINOLOGY, Fetal medicine < OBSTETRICS, Maternal medicine < OBSTETRICS, Clinical trials < THERAPEUTICS                                                                                                                                                                                                                                                                                                                                                                                                                                                                                                                                                                                                                                                                                                                                                                                                                                                                                                                                                                                                                                                                                                                                                                                                                                                                                                                                                                                                                                                                                                                                                                                |
|                                 |                                                                                                                                                                                                                                                                                                                                                                                                                                                                                                                                                                                                                                                                                                                                                                                                                                                                                                                                                                                                                                                                                                                                                                                                                                                                                                                                                                                                                                                                                                                                                                                                                                                                                                                              |

SCHOLARONE™  
Manuscripts

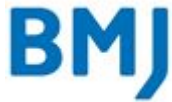

I, the Submitting Author has the right to grant and does grant on behalf of all authors of the Work (as defined in the below author licence), an exclusive licence and/or a non-exclusive licence for contributions from authors who are: i) UK Crown employees; ii) where BMJ has agreed a CC-BY licence shall apply, and/or iii) in accordance with the terms applicable for US Federal Government officers or employees acting as part of their official duties; on a worldwide, perpetual, irrevocable, royalty-free basis to BMJ Publishing Group Ltd ("BMJ") its licensees and where the relevant Journal is co-owned by BMJ to the co-owners of the Journal, to publish the Work in this journal and any other BMJ products and to exploit all rights, as set out in our [licence](#).

The Submitting Author accepts and understands that any supply made under these terms is made by BMJ to the Submitting Author unless you are acting as an employee on behalf of your employer or a postgraduate student of an affiliated institution which is paying any applicable article publishing charge ("APC") for Open Access articles. Where the Submitting Author wishes to make the Work available on an Open Access basis (and intends to pay the relevant APC), the terms of reuse of such Open Access shall be governed by a Creative Commons licence – details of these licences and which [Creative Commons](#) licence will apply to this Work are set out in our licence referred to above.

Other than as permitted in any relevant BMJ Author's Self Archiving Policies, I confirm this Work has not been accepted for publication elsewhere, is not being considered for publication elsewhere and does not duplicate material already published. I confirm all authors consent to publication of this Work and authorise the granting of this licence.

1  
2  
3  
4  
5  
6  
7  
8  
9  
10  
11  
12  
13  
14  
15  
16  
17  
18  
19  
20  
21  
22  
23  
24  
25  
26  
27  
28  
29  
30  
31  
32  
33  
34  
35  
36  
37  
38  
39  
40  
41  
42  
43  
44  
45  
46

1  
2  
3  
4  
5  
6  
7  
8  
9  
10  
11  
12  
13  
14  
15  
16  
17  
18  
19  
20  
21  
22  
23  
24  
25  
26  
27  
28  
29  
30  
31  
32  
33  
34  
35  
36  
37  
38  
39  
40  
41  
42  
43  
44  
45  
46

**The Effectiveness of Real-Time Continuous Glucose Monitoring to Improve Glycaemic Control and Pregnancy Outcome in Patients with Gestational Diabetes Mellitus: A Study Protocol for a Randomised Controlled Trial**

Evelyn Huhn (1), Tina Linder (2), Daniel Eppel (2), Karen Weißhaupt (3), Christine Klapp (3), Karen Schellong (3), Wolfgang Henrich (3), Gülen Yerlikaya-Schatten (2), Ingo Rosicky (2), Peter Husslein (2), Kinga Chalubinski (2), Martina Mittlböck (4), Petra Rust (5), Irene Hoesli (1), Bettina Winzeler (6), Johan Jendle (7), Tanja Fehm (8), Andrea Icks (9,10,11), Markus Vomhof (9,10,11), Gregory Gordon Greiner (9,10,11), Julia Szendrödi (11,12,13), Michael Roden (11,12,13), Andrea Tura (14), Christian Göbl (2)

(1) Department of Obstetrics and Gynaecology, University Hospital Basel, Basel, Switzerland

(2) Department of Obstetrics and Gynecology, Division of Obstetrics and Feto-maternal Medicine, Medical University of Vienna, Vienna, Austria

(3) Clinic of Obstetrics, Charité-Universitätsmedizin Berlin, Corporate Member of Freie Universität Berlin, Humboldt-Universität zu Berlin, and Berlin Institute of Health, Campus Virchow-Klinikum, Berlin, Germany

(4) Center of Medical Statistics, Informatics, and Intelligent Systems, Section for Clinical Biometrics, Medical University of Vienna, Vienna, Austria

(5) Department of Nutritional Sciences, University of Vienna, Austria

(6) Department of Endocrinology, Diabetology and Metabolism, University Hospital Basel, Basel, Switzerland

(7) Institution of Medical Sciences, Örebro University, Örebro, Sweden

(8) Department of Obstetrics and Gynaecology, Medical Faculty, Heinrich-Heine University Düsseldorf, Düsseldorf, Germany

(9) Institute of Health Services Research and Health Economics, Centre for Health and Society, Faculty of Medicine, Heinrich Heine University, Düsseldorf, Germany

(10) Institute for Health Services Research and Health Economics, German Diabetes Center at Heinrich-Heine University Düsseldorf, Leibniz Institute for Diabetes Research, Düsseldorf, Germany

(11) German Center for Diabetes Research, München-Neuherberg, Germany

(12) Division of Endocrinology and Diabetology, Medical Faculty, Heinrich-Heine University Düsseldorf, Düsseldorf, Germany

(13) Institute for Clinical Diabetology, German Diabetes Centre, Leibniz Institute for Diabetes Research at Heinrich-Heine University, Düsseldorf, Germany

(14) Metabolic Unit, Institute of Neuroscience, National Research Council, Padova, Italy

Corresponding Address

Christian S. Göbl, MD PhD

Department of Obstetrics and Gynaecology

Division of Obstetrics and feto-maternal Medicine

Medical University of Vienna

Währinger Gürtel 18-20

A.1090 Vienna, Austria

Tel.: 0043 1 40400 28220

Email: [Christian.goebel@meduniwien.ac.at](mailto:Christian.goebel@meduniwien.ac.at)

**Conflict of interest**

1  
2  
3 The authors declare that there are no further financial or personal relationships with other  
4 people or organizations that could inappropriately influence the work reported or the  
5 conclusions, implications, or opinions stated.  
6  
7  
8

9  
10 **Key Words**

11 2 Gestational diabetes mellitus, diagnosis, real-time continuous glucose monitoring, glycaemic  
12 3 control.  
13 4

14  
15  
16 **Short title**

17 6 Continuous glucose monitoring to improve glycaemic control and pregnancy outcome in  
18 7 gestational diabetes.  
19 8

20  
21  
22 **Word Count**

23 10 Text: 6,244

Abstract: 426

24 11 Tables: 0

Figures: 1  
25  
26  
27  
28  
29  
30  
31  
32  
33  
34  
35  
36  
37  
38  
39  
40  
41  
42  
43  
44  
45  
46  
47  
48  
49  
50  
51  
52  
53  
54  
55  
56  
57  
58  
59  
60

## 1 ABSTRACT

2  
3  
4  
5  
6  
7  
8  
9  
10  
11  
12  
13  
14  
15  
16  
17  
18  
19  
20  
21  
22  
23  
24  
25  
26  
27  
28  
29  
30  
31  
32  
33  
34  
35  
36  
37  
38  
39  
40  
41  
42  
43  
44  
45  
46  
47  
48  
49  
50  
51  
52  
53  
54  
55  
56  
57  
58  
59  
60

**Introduction:** Real-time continuous glucose monitoring (rt-CGM) informs users about current interstitial glucose levels and allows early detection of glycaemic excursions and timely adaptation by behavioural change or pharmacologic intervention. Randomized controlled studies adequately powered to evaluate the impact of long-term application of rt-CGM systems on the reduction of adverse obstetric outcomes in women with gestational diabetes (GDM) are missing. We aim to assess differences in the proportion of large for gestational age (LGA) newborns in women using rt-CGM as compared to women with self-monitored blood glucose (primary outcome). Rates of neonatal hypoglycaemia, caesarean section and shoulder dystocia are secondary outcomes. A comparison of glucose metabolism and quality of life during and after pregnancy completes the scope of this study.

**Methods and analysis:** Open-label multicentre randomized controlled trial with two parallel groups including 372 female patients with a recent diagnosis of GDM (between 24+0 until 31+6 weeks of gestation): 186 with rt-CGM (Dexcom G6) and 186 with self-monitored blood glucose (SMBG). Women with GDM will be consecutively recruited and randomized to rt-CGM or control (SMBG) group after a run-in period of 6 to 8 days. The third visit will be scheduled 8 to 10 days later and then every two weeks. At every visit, glucose measurements will be evaluated and all patients will be treated according to the standard care. The control group will receive a blinded CGM for 10 days between the second and third visit and between week 36+0 and 38+6. Cord blood will be sampled immediately after delivery. 48 hours after delivery neonatal biometry and maternal HbA1c will be assessed, and between week 8 to 16 after delivery all patients receive a re-examination of glucose metabolism including blinded CGM for 8 to 10 days.

**Ethics and dissemination:** This study received ethical approval from the main ethic committee in Vienna. It was registered under [www.ClinicalTrials.gov](http://www.ClinicalTrials.gov) (NCT03981328). Data will be presented at international conferences and published in peer-reviewed journals.

1  
2  
3 **Strengths and limitations of the study:**  
4

- 5 2 - This is a randomised controlled trial recruiting 372 pregnant women after the GDM  
6 3 diagnosis at 5 sites in Austria, Germany, Sweden and Switzerland.  
7  
8 4 - The study uses the newest version of a real-time CGM (rt-CGM) system which enables  
9 5 the user rapidly to identify glycaemic excursions and allows timely adaptation by  
10 6 behavioural change or pharmacologic intervention.  
11  
12 7 - The study will increase knowledge about possible limitations of SMBG (routine care),  
13 8 such as undetected hyper- or hypoglycaemia.  
14  
15 9 - The study might show possible improvement of adverse perinatal outcome and  
16 10 particularly fetal macrosomia in offspring of mothers with GDM monitored by rt-CGM  
17 11 versus SMGB.  
18  
19  
20  
21  
22  
23  
24  
25  
26  
27  
28  
29  
30  
31  
32  
33  
34  
35  
36  
37  
38  
39  
40  
41  
42  
43  
44  
45  
46  
47  
48  
49  
50  
51  
52  
53  
54  
55  
56  
57  
58  
59  
60



## 2 INTRODUCTION

The incidence of obesity and diabetes is rising worldwide even in younger populations. With a rise in maternal obesity also gestational diabetes mellitus (GDM) becomes more prevalent with a prevalence of up to 18% of pregnancies[1,2]. Previous studies found hyperglycaemia in pregnancy to be associated with gestational complications including macrosomia and neonatal hyperinsulinaemic hypoglycaemia[3] and an increased long-term risk for obesity or diabetes in the offspring's later life[4]. Large interventional trials provided evidence that obstetric and neonatal complications such as large for gestational age offspring (LGA, defined as birthweight >90th pctl) or shoulder dystocia can be significantly reduced by intensified treatment of even mild forms of maternal hyperglycaemia (e.g. by lifestyle modification or pharmacotherapy)[5–7].

Continuous glucose monitoring (CGM) has been shown to improve glycaemic control without increasing the risk of hypoglycaemia in patients with type 1 and 2 diabetes[8,9]. In 2003, a study compared the glycaemic profile reflected by CGM and SMBG in 34 gravid patients with type 1 diabetes over a period of 3 days and found that on average more than 3 hours of hyperglycaemic episodes per day were undetected by SMBG and nocturnal hypoglycaemic episodes could be revealed by CGM 1-4 hours before showing clinical manifestations or being detected by SMBG.[10] However, only a small number of studies evaluated the use of CGM in pregnancies affected by GDM: In the setting of a larger non-randomized observational study Yu et al.[11] found that mothers in the CGM group (use over 72 hours every 2 to 4 weeks) had improved glycaemic control as well as a lower amount of glycaemic variability as compared to a control group using SMBG. In addition, the CGM-group showed lower birth weight percentiles associated with a lower risk for LGA offspring (13.7 vs. 25.8%) or neonatal hypoglycaemia (5.5 vs. 14%). Also a second observational study including 57 pregnant women with GDM indicated that CGM was more effectively detecting hyperglycaemic episodes as well as nocturnal hypoglycaemia than SMBG[12]. A study in 73 pregnant women with GDM, randomly assigned to either SMBG or CGM for a duration of 48h after diagnosis, found that CGM detected a markedly higher proportion of women requiring glucose lowering pharmacotherapy (31 vs 8%)[13]. Another randomized controlled trial on 106 women with GDM observed significantly lower weight gain associated with CGM. LGA cases were more often observed in the SMBG group (52.7 vs. 35.3%). However, the difference failed statistical significance as the study was not powered for obstetrical outcomes[14].

Unfortunately, both randomized controlled studies used older versions of a blinded CGM device, where glucose values were not directly visible for patients. In contrast, more recently developed “real-time” CGM (rt-CGM) systems provide users with information about current glucose levels and alert the patient before the upper or lower glucose threshold is

1 reached or when glucose levels change rapidly. Hence, glycaemic excursions can be rapidly  
2 identified and accordingly adapted by behavioural change or pharmacologic intervention. A  
3 number of studies including non-pregnant patients showed superiority of rt-CGM over older  
4 blinded CGM versions in order to effectively empower and educate patients with diabetes to  
5 better understand how dietary habits, exercise or pharmacotherapy affects their glucose  
6 levels[15]. A beneficial effect of rt-CGM in pregnancy was also supported by the CONCEPTT  
7 trial for pregnant women with type 1 diabetes[16]. Only one recent study compared SMBG with  
8 rt-CGM in women with GDM using a single application for 3 to 7 days within two weeks after  
9 diagnosis but it failed to demonstrate improvements in HbA1c or pregnancy outcomes, which  
10 was, however, likely due to the sample size and the short duration of intervention (single  
11 application)[17].

12 Taken together, larger randomized controlled studies adequately powered to evaluate  
13 the impact of long-term application of rt-CGM systems on the risk reduction of adverse obstetric  
14 outcomes are missing[18]. Of note, such studies are of high clinical relevance because of their  
15 guideline-changing potential. In addition, rt-CGM has the potential to reduce reported barriers  
16 to SMBG (such as inconvenience, pain or stigma of testing in public places) in order to improve  
17 poor reliability and adherence to glucose monitoring, which is a non-negligible problem in the  
18 treatment of GDM[19].

## 19 Hypotheses

20 The main hypothesis of the proposed study is that rt-CGM can effectively reduce the risk for  
21 LGA newborns (primary outcome) and other neonatal and obstetric complications. It is further  
22 hypothesized that rt-CGM can improve maternal glycaemic control, body weight gain during  
23 pregnancy and (as rt-CGM potentially improves self-management strategies) has beneficial  
24 effects on maternal metabolism after pregnancy.

## 25 Primary and secondary outcomes

26 *Primary objective:* To assess differences in the proportion of LGA newborns (birth weight >90th  
27 pctl) in women with GDM using rt-CGM as compared to women with GDM using SMBG.

28 *Secondary objectives:* To assess differences in further obstetric or neonatal complications,  
29 neonatal hypoglycaemia, rate of caesarean section, shoulder dystocia and neonatal  
30 anthropometry will be assessed as secondary objectives. Further secondary outcomes are:  
31 differences in neonatal hyperinsulinemia, rt-CGM measures such as mean interstitial glucose,  
32 glycaemic variability, time in target (65 to 140 mg/dl [3.6 to 7.8 mmol/l]) as well as time spent  
33 in hyper- and hypoglycaemia (Time above and below range) (day-time: 07.01 to 22.59hr and  
34 night-time: 23.00 to 07.00hr), duration and frequency postprandial hyperglycaemic excursions,  
35 start and amount of glucose lowering therapy, HbA1c, glycosylated fibronectin, change in  
36 bodyweight during pregnancy and after delivery as well as glucose disposal at postpartum  
37 (markers of insulin sensitivity, insulin secretion and  $\beta$ -cell function assessed by a postpartum

1  
2  
3 1 OGTT). Health-related quality of life (HRQoL) is a patient-reported outcome which has become  
4 2 as important in the evaluation of interventions as patient-relevant clinical outcomes. Therefore,  
5 3 HRQoL will be elicited. In addition, preferences will be assessed, and a health economic  
6 4 evaluation in terms of cost-effectiveness and cost-utility analysis will be performed.  
7  
8  
9

### 10 **Expected effects on the advancement of clinical practice**

11 6 The aim of this proposal is to assess the ability of rt-CGM to improve glycaemic control  
12 7 (reduction of mean glucose, hyperglycaemic episodes and duration, improvement of glycaemic  
13 8 variability) in order to prevent adverse pregnancy outcomes and neonatal complications in  
14 9 women with GDM. The results of this study will contribute to:

- 15 10 • The improvement of clinical monitoring and management of glucose metabolism during  
16 11 pregnancy with GDM
  - 17 12 • Increased knowledge about possible limitations of SMBG (routine care), such as undetected  
18 13 hyper- or hypoglycaemia, as well as to determine if comprehensive glucose data (as derived  
19 14 from rt-CGM) results in more or fewer women needing pharmacotherapy
  - 20 15 • Possible improvement of adverse perinatal outcome and particularly fetal macrosomia in  
21 16 offspring of mothers with GDM
- 22  
23  
24  
25  
26  
27  
28  
29  
30  
31  
32  
33  
34  
35  
36  
37  
38  
39  
40  
41  
42  
43  
44  
45  
46  
47  
48  
49  
50  
51  
52  
53  
54  
55  
56  
57  
58  
59  
60

### 3 METHODS AND ANALYSIS

#### 3 Participants and recruitment; Inclusion criteria

This study is designed as an open-label multicentre randomized controlled trial with two parallel groups including a total of 372 female patients (n=186 with rt-CGM, n=186 with SMBG) with a recent diagnosis of GDM. Diagnosis of GDM (i.e. diabetes first diagnosed in the second and third trimester and not clearly type 1 or type 2 diabetes[20]) is made in accordance with the IADPSG criteria after 24+0 weeks of gestation by a 2h 75g OGTT[21]. The study will be conducted at five academic hospitals in Austria, Switzerland, Sweden and Germany. All pregnant females (aged between 18 and 55 years) will be consecutively recruited after diagnosis of GDM between 24+0 and 31+6 weeks of gestation among women visiting the pregnancy outpatient departments (Division of Obstetrics and feto-maternal Medicine, Medical University of Vienna, Austria; Division of Obstetrics, University Hospital Basel, Switzerland; Department of Obstetrics, Charité-Universitätsmedizin Berlin, Germany) or the diabetes outpatient departments (Division of Endocrinology and Metabolic Diseases at the Heinrich Heine University, Düsseldorf, Germany; Department of Medicine, University Hospital, Örebro, Sweden).

#### 3 Exclusion criteria

Overt diabetes (i.e. pregestationally known type 1 or type 2 diabetes or fasting plasma glucose during the OGTT  $\geq 126$  mg/dl [7.0 mmol/l] or HbA1c  $\geq 6.5\%$  [44 mmol/l] or 2h post-load OGTT levels  $\geq 200$  mg/dl [11.1 mmol/l] assessed before 24+0 weeks of gestation, whereby results need to be confirmed by repeated testing in the absence of unequivocal hyperglycaemia according to the ADA standards[20]), history of bariatric surgery or other surgeries that induce malabsorption, long-term use (>2 weeks) of systemic steroids prior to enrolment, multiple pregnancy, patients already using glucose lowering medications (metformin or insulin) before study entry, fetal growth restriction due to placental dysfunction at study entry, inpatient psychiatric treatment up to 1 year before enrolment, participation in this study in previous pregnancy.

#### 3 Study visits during pregnancy

A flow-diagram of the study visits is provided in Figure 1. A broad risk evaluation will be performed in participating females at the initial contact (V1) including: evaluation of maternal age, parity, history of GDM in previous pregnancies, detailed family history, ethnicity, preconceptional diseases, obstetric history. Height (stadiometer measured to the nearest centimetre) and actual weight (calibrated scales, light indoor clothing) will be additionally assessed. Moreover, an evaluation of preconceptional weight (self-reported) and body mass index (BMI) as well as measurement of blood pressure will be performed. All patients receive

1  
2  
3 1 medical advice for nutrition (isocaloric diet containing 40-50% carbohydrates, 20% proteins  
4 and 30-35% fat, divided into three meals and three snacks) and regular physical exercising for  
5 2  
6 3 30 minutes per day following international recommendations. In addition, participants are  
7 4  
8 5 advised on capillary blood glucose measurement (fasting as well as 1h after starting each  
9 6  
10 7 meal) at the initial visit (V1). Randomization will be done after a run-in period of 6 to 8 days  
11 8  
12 9 when patients get used to SMBG (V2). The third visit (V3) will be scheduled 8 to 10 days after  
13 10  
14 11 V2 and further follow-up visits every two weeks (i.e. 12 to 16 days after each visit). HbA1c and  
15 12  
16 13 glycosylated fibronectin will be assessed at V2 as well as at the first visit between 36+0 and  
17 14  
18 15 38+6 weeks of gestation (12 ml, non-fasting state) (V4). Detailed fetal ultrasound  
19 16  
20 17 examinations, a detailed examination of dietary intake as well as a blinded CGM (control group  
21 18  
22 19 only) will be performed at V2 and V4. Body weight change and use of glucose lowering  
23 20  
24 21 medications (amount of insulin units) will be examined at every visit. At every follow-up visit  
25 22  
26 23 glucose measurements (SMBG or rt-CGM) and routine ultrasound examinations (fetal  
27 24  
28 25 biometry and umbilical artery doppler) will be evaluated by the medical staff and all patients  
29 26  
30 27 will be treated according to the standard of care for patients with GDM. This includes lifestyle  
31 28  
32 29 modification and insulin therapy if recommended thresholds are exceeded. Both groups will be  
33 30  
34 31 treated to be in the target range between 65 to 140 mg/dl [3.6 to 7.8 mmol/l] with at least 8h  
35 32  
36 33 fasting glucose levels equal or below 95 mg/dl [5.3 mmol/l] and 1h postprandial glucose  
37 34  
38 35 measurements equal or below 140 mg/dl [7.8 mmol/l] in accordance with the CONCEPTT  
39 36  
40 37 study[16] and the ADA recommendations[22], respectively. Intermediate acting neutral  
41 38  
42 39 protamine Hagedorn (NPH) insulin is started in the evening if  $\geq 2$  measurements of fasting  
43 40  
44 41 glucose are equal or above 95 mg/dl [5.3 mmol/l] in a period of one week and rapid acting  
45 42  
46 43 insulin analogues (Aspart or Lispro) if  $\geq 2$  measurements of 1h postprandial glucose (either  
47 44  
48 45 after breakfast, lunch or dinner) are equal or above 140 mg/dl [7.8 mmol/l] in a period of one  
49 46  
50 47 week. NPH is started with 6 to 10 IU and increased by 4 IU (or in case of higher doses i.e.  $>25$   
51 48  
52 49 IU by 20%) and rapid acting insulin (bolus insulin) is started with 2 to 4 IU and increased by 2  
53 50  
54 51 to 4 IU if thresholds are not achieved within three days. Long acting insulin analogues such as  
55 52  
56 53 glargine (U100/U300) or detemir can be used as an alternative to NPH. Patients are trained  
57 54  
58 55 on insulin management and titration according to their glucose levels. Metformin can be used  
59 56  
60 57 according to local practice guidelines (recommended in Sweden but not in Austria, Germany  
61 58  
62 59 or Switzerland as first-line pharmacological intervention).

### 32 **Study visits postpartum**

33 Cord blood will be sampled and stored (at  $-80^{\circ}\text{C}$ ) immediately after delivery (VPP0). A  
34 34  
35 35 postpartum examination will be scheduled within 48 hours after delivery (VPP1) for  
36 36  
37 37 assessment of neonatal parameters and maternal HbA1c and glycosylated fibronectin (12 ml,  
38 38  
39 39 non-fasting state), as well as between 8 to 16 weeks after delivery (VPP2) in all patients for a  
40 40  
41 41 detailed re-examination of glucose homeostasis postpartum (including lifestyle and dietary

1  
2  
3 1 pattern as well as HbA1c, glycosylated fibronectin as well as a blinded CGM for 10 days and  
4 2 an OGTT to assess the presence of prediabetic conditions after pregnancy with GDM). The  
5 3 postpartum OGTT is further used to provide estimates of insulin sensitivity,  $\beta$ -cell function and  
6 4 hepatic insulin extraction, the major physiological components of impaired glucose tolerance.  
7  
8  
9

### 10 5 **Randomization**

11 6 Participants will be randomized to either treatment (rt-CGM augmented glucose monitoring) or  
12 7 control group (routine care SMBG) in a 1:1 ratio. The minimization method[23] with a 0.85  
13 8 assignment probability will be used to minimize the imbalance between the groups according  
14 9 to week of gestation at study entry i.e. at V1 (three strata: 24+0 to 25+6, 26+0 to 27+6, 28+0  
15 10 to 29+6, 30+0 to 31+6), previous pregnancy with GDM (two strata: yes or no) and  
16 11 preconceptional overweight/obesity status with three strata: i. normal weight (i.e. BMI below  
17 12 25.0 kg/m<sup>2</sup>); ii. overweight (BMI 25.0 – 29.9 kg/m<sup>2</sup>); iii. obesity (BMI equal or above 30.0 kg/m<sup>2</sup>).  
18 13 Randomization will be performed at the second study visit (V2) by using a randomization  
19 14 software provided by the Medical University of Vienna.  
20  
21  
22  
23  
24  
25  
26

### 27 15 **Intervention**

28 16 Patients randomized to the intervention group will be equipped with a rt-CGM sensor (Dexcom  
29 17 G6 sensor, a small flexible device that records interstitial glucose levels every five minutes) at  
30 18 V2. The sensor will be inserted into the subcutaneous tissue of the anterior abdominal wall (if  
31 19 this location is not tolerated by the pregnant patients, the upper buttock or posterior upper arm  
32 20 may be used instead). Additionally, patients will be advised to record capillary blood glucose  
33 21 values if glucose alerts or readings do not match with symptoms or expectations. Participants  
34 22 will be educated on how to exchange the sensor (has to be exchanged every ten days) and  
35 23 will be equipped with a real-time CGM monitor and instructed in its use. The monitor provides  
36 24 the user with information about current glucose levels and notifies the patient before her upper  
37 25 or lower glucose threshold are reached and when glucose levels change rapidly. All patients  
38 26 in the intervention group will be specially trained in the use of the system. As an alternative to  
39 27 the real-time monitor the patients' smart phone with an anonymized access to the CLARITY®  
40 28 mobile app can be used (details see below: "Intervention: Device description").  
41  
42  
43  
44  
45  
46  
47  
48

### 49 29 **Intervention: Device description**

50 30 The Dexcom G6 intended use is for the management of diabetes in persons aged 2 years and  
51 31 older. The Dexcom G6 System is intended to replace fingerstick blood glucose testing for  
52 32 diabetes treatment decisions. Interpretation of the Dexcom G6 System results should be based  
53 33 on the glucose trends and several sequential readings over time. The Dexcom G6 System also  
54 34 aids in the detection of episodes of hyperglycaemia and hypoglycaemia, facilitating both acute  
55 35 and long-term therapy adjustments. The Dexcom G6 System can be used alone or in  
56 36 conjunction with digitally connected medical devices for the purpose of managing diabetes.  
57  
58  
59  
60

1  
2  
3 1 The system consists of a sensor, transmitter, receiver, and mobile app. The sensor is  
4 2 a small, flexible wire inserted into subcutaneous tissue where it converts glucose into electrical  
5 3 current. The sensor incorporates an interferent layer that minimizes the effect of potential  
6 4 electroactive interferents, such as acetaminophen, by preventing it from reaching the sensor  
7 5 wire surface. The benefit of this interferent layer in blocking the effects of acetaminophen  
8 6 prevents falsely high glucose readings. Thus, users may ingest acetaminophen while wearing  
9 7 the G6 CGM system. The transmitter, which is connected to the sensor and worn on the body,  
10 8 samples the electrical current produced by the sensor and converts the measurement into a  
11 9 glucose reading using an onboard algorithm. The receiver and/or the app displays the glucose  
12 10 reading along with a rate of change arrow and a trend graph. Additionally, the receiver and/or  
13 11 app issues alarms and alerts to notify the patient of glucose level changes and other important  
14 12 system conditions. Also, alarms will be provided if the receiver detects loss of connection to  
15 13 the sensor. The app provides the additional capability to share data with “followers” using the  
16 14 Dexcom Share service. The receiver can be put into a blinded mode using CLARITY® software.  
17 15 In this mode, users are unable to see the CGM data or receive CGM alerts.

18 16 CGM Ancillary Devices Dexcom CLARITY® is an accessory for users of the Dexcom  
19 17 CGM system. It is a software program that allows the transfer of glucose data from the CGM  
20 18 system to Dexcom remote servers for data management to allow the use of the CGM data by  
21 19 the user and study clinicians. Target ranges of 65 to 140 mg/dl [3.6 to 7.8 mmol/l] will be set  
22 20 and the patients will be introduced in the use of alarm settings. Both participants and study  
23 21 sites will use CLARITY® to transfer glucose data between user and study site, whether CGM  
24 22 is used in blinded or real-time mode. A CLARITY® mobile app can be used for a retrospective  
25 23 review of glucose data on the smart device and can also be set up to allow receipt of push  
26 24 notifications of CGM data facilitating weekly data review. For all patients (intervention and  
27 25 control group) an anonymized CLARITY® account will be created by using a sequential study  
28 26 number which is allocated at randomization (sex will be female and birth date for each account  
29 27 will be set to 1.1.1990 for all accounts). CLARITY® also provides metrics to check for patient  
30 28 compliance.

### 31 29 **Intervention: Study proceedings**

- 32 30 - For participants who have a supported phone, the G6 CGM app will be installed on
- 33 31 participant’s smart phone.
- 34 32 - An anonymized CLARITY® mobile account will be set up and linked to the research site.
- 35 33 - Participants will use CGM data for their diabetes management.
- 36 34 - A high alert threshold will be set at 140 mg/dl [7.8 mmol/l]. Low alert threshold and urgent low
- 37 35 soon alerts will be turned off. If participants require insulin, the low alert will be turned on and
- 38 36 the threshold set at 65 mg/dl [3.6 mmol/l]. In addition, the urgent low alert (55 mg/dl [3.1
- 39 37 mmol/l]), the urgent low soon alert (when glucose levels are falling fast and will be below 55

1 mg/dl [3.1 mmol/l] in less than 20 min) as well as alerts for rise and fall rate (3 mg/dl [0.17 mmol/l]) in addition to alerts for signal loss and no readings for more than 20 min will be enabled.

- Participants with applicable smart phones may have CLARITY® push notifications on the CLARITY® mobile app about weekly time in range comparison enabled during the study.

- For app users, the “Share and Follow” functionality will be discussed and encouraged (i.e. the study participants are able to invite followers to review their glucose levels).

- For participants using the receiver only, the receiver will be downloaded into the CLARITY® clinic account at each visit.

- For participants using real-time CGM data summary will be downloaded for documentation at V3 and V4 (between 36+0 and 38+6) as well as after delivery (VPP1).

- The research team will review the CGM in CLARITY® to inform lifestyle and therapy recommendations.

- The Dexcom G6 system does not require calibration during the study period.

### Control group

The participants of the control group will perform self-monitored blood glucose testing with a study-provided blood glucose meter, including testing supplies. They will perform capillary blood glucose monitoring as routinely used for patients with GDM, i.e., at least four capillary blood glucose values daily including measurements in a fasting state as well as 1h after starting each meal by using a routinely available blood glucose measurement device. The study participants will keep a logbook of their glucose values, which will be reviewed by clinicians from the study team at each visit and used for lifestyle and dietary recommendations as is routinely done in clinical practice. From V2 to V3 as well as once for ten days between gestational week 36+0 and 38+6 the control group receive blinded CGM; neither patients nor the treating medical staff will have access to the data recorded by the CGM sensor at this point in time. Instead, patients will control blood glucose levels based on SMBG, as is the routine procedure in current GDM treatment. Otherwise, the control group will receive the same study assessments as the intervention group. The blinded CGM will be removed and returned to Dexcom after the 10-day wear period after CGM data is uploaded to CLARITY® by an unblinded investigator who must not communicate about the results with patients or medical staff.

Each participant of the control group will be assigned a study blood glucose meter to measure and store their blood glucose values during the study. Therefore, the Contour® Next One system will be used. The meter has CE Mark clearance and is commercially available in Europe. Participants will receive an ample supply of meter test materials based on quantities routinely used. A commercially available desktop software (Diabass® Pro) used in conjunction with Contour® Next One system glucose meter for blood glucose monitoring, will be utilized for



1  
2  
3 1 downloading the meter data by the sites at V3 and V4 after checking that dates and times are  
4 2 correct.

5 3 Blood glucose meters used by the control group will be assessed to establish frequency  
6 4 of testing (overall and per week) as well as percentage of days with less than four  
7 5 measurements per day.  
8 6

### 7 **Analyses of CGM data**

8 Rt-CGM data allows a detailed examination of the percentage of time in which glucose levels  
9 10 are in target range (time in target) (65 to 140 mg/dl [3.6 to 7.8 mmol/l]), hyperglycaemic  
11 12 episodes (glucose  $\geq$ 140 mg/dl [7.8 mmol/l]) as well as mild (<65 mg/dl [3.6 mmol/l]), moderate  
13 14 ( $\leq$ 54 mg/dl [3.0 mmol/l]) or severe hypoglycaemic episodes (requiring third party assistance)  
15 16 and their duration. To this purpose, several indices of the glucose control quality will be  
17 18 calculated, such as GRADE (Glycaemic Risk Assessment Diabetes Equation) some indices of  
19 20 hypoglycaemia and hyperglycaemia, such as the HBGI (High Blood Glucose Index) and LBGI  
21 22 (Low Blood Glucose Index), and indices assessing the risk associated to both low and high  
23 24 glycaemic values, such as IGC (Index of Glycaemic Control) and ADRR (Average Daily Risk  
25 26 Range). Glycaemic variability will also be assessed, which can be quantified by standard  
27 28 deviation of the CGM data, or by more sophisticated indices, such as MAGE (Mean Amplitude  
29 30 Glucose Excursions), CONGA (Continuous Overlapping Net Glycaemic Action), Liability  
31 32 Index[24,25], as well as further indices that we developed internally, such as the Shape  
33 34 Index[26]. These will be compared between real-time CGM users and controls (i.e. from data  
35 36 obtained during the blinded CGM wear).  
37 38

### 39 **Assessment of dietary patterns**

40 Dietary patterns will be assessed in all patients at V1, VPP1, and VPP2 via a published and  
41 42 validated Food-Frequency-Questionnaire (FFQ) proposed by the German Robert Koch  
43 44 Institute[27]. It was also previously used for the German DEGS project ([www.degs-studie.de](http://www.degs-studie.de)).  
45 46 Information from the FFQ will be analysed quantitatively or summarized by eating scores  
47 48 proposed in the literature (such as the Healthy Eating Index 2010 or Alternate Healthy Eating  
49 50 Index 2010) reflecting diet quality based on actual guidelines[28,29]. In addition, all patients  
51 52 will be advised to conduct a nutritional protocol (seven days) from V2 to V3 as well as once at  
53 54 V4 (between 36+0 and 38+6 weeks of gestation). In a subgroup (only study site Vienna) dietary  
55 56 intake will also be assessed by performing 24-h-recalls by trained interviewers at V2, V4 and  
57 58 postpartum (VPP2): one face-to-face interview (approx. one hour) and the others as telephone  
59 60 interviews (approx. 30 minutes) during which data are entered simultaneously in GloboDiet.  
61 62 GloboDiet is a computerized program which was developed by the International Agency for  
63 64 Cancer Research (IARC) within the framework of the European Prospective Investigation into  
65 66 Cancer and Nutrition Study (EPIC-Study) for the conduction of harmonized and standardized  
67 68

1 24-h-recalls[30]. This open-ended software was used in numerous previous studies and was  
2 validated within the EFCOVAL project[31–33]. In brief, GloboDiet is an interview-based dietary  
3 assessment instrument that allows obtaining a very detailed description and quantification of  
4 foods, recipes, and supplements consumed in the course of the preceding day and thus  
5 standardising data within and between countries. Probing questions and entering consumed  
6 foods in chronological order support the respondent's memory. The standardized structure  
7 prescribes – on the food group level – possibilities of description and quantification of food  
8 items to choose from. Quantification of consumed foods is supported by the GloboDiet picture  
9 book that comprises coloured photographs of foods in different portion sizes, photographs of  
10 familiar household measures and schematic displays of forms (e.g. bread, cake). The software  
11 provides an automatic coding of food items and recipe ingredients as well as a rough  
12 calculation of nutrient intake meant for quality control of the interview. GloboDiet is  
13 characterized by the obtained standardization of dietary data within Europe, a large number of  
14 available foods and recipes, and a very detailed description of consumed foods. Currently,  
15 GloboDiet is one of the few dietary instruments providing comparable nutritional data within  
16 Europe. After finalization of the interviews, GloboDiet will be linked to the local nutrition  
17 database – the Bundeslebensmittelschlüssel (BLS) enhanced by the Austrian Nutrition Table  
18 (Österreichische Nährwerttabelle, ÖNWT), containing typical Austrian foods and recipes –  
19 allowing analyses on food ingredients level and to conduct precise energy and risk  
20 assessment.

### 21 **Assessment of physical activity**

22 Physical activity will be assessed at V1, VPP1, and VPP2 via the International IPAQ (Physical  
23 Activity Questionnaire, long-form). The IPAQ represents a well-accepted, validated instrument  
24 for monitoring population levels of physical activity in different settings and countries[34]. It will  
25 be analysed via published guidelines for data processing and analysis at the IPAQ homepage  
26 Guidelines for data processing and analysis of the international physical activity questionnaire  
27 (IPAQ)[35]: In short, collected data will be summarized as median MET (metabolic equivalent  
28 of task) minutes per week, representing a continuous score for walking, moderate intensity  
29 activities, vigorous intensity activities and total activities, as recommended. In addition, the  
30 Pregnancy Physical Activity Questionnaire (PPAQ) will be performed to capture information on  
31 physical activity participation and sedentary behaviour during pregnancy[36].

### 32 **Assessment of maternal intramyocellular and intrahepatocellular lipids**

33 Intramyocellular (IMCL), and intrahepatocellular lipid contents (HCL) will be measured by using  
34 proton magnetic resonance spectroscopy ( $^1\text{H}$  MRS) in a subgroup of 40 patients (20 rt-CGM,  
35 20 SMBG) at V3 and after delivery (VPP2) according to previously described methods[37–39].  
36 The participants will be studied in supine position within a 3.0 Tesla whole-body magnet  
37 (Siemens or Philips). MRS is a non-invasive technique to evaluate tissue-specific metabolism

1  
2  
3 1 and was shown to be safe and well tolerated by pregnant women in previous studies[40,41].  
4 2 Patients will be positioned with a left pelvic tilt to avoid pressure on the inferior vena cava  
5 3 according to other studies in pregnancy[41]. For IMCL measurements, the calf muscle (right  
6 4 leg) will be positioned in a quadrature bird cage <sup>1</sup>H volume coil. A circular <sup>1</sup>H surface coil will  
7 5 be positioned over the liver for HCL measurement.  
8  
9  
10

### 11 6 **Fetal biometry**

12 7 Parameters of fetal anthropometry as determined by ultrasound as well as neonatal data  
13 8 including length, weight, gestational age at delivery will be included in the final analysis. A  
14 9 detailed fetal ultrasound examination will be performed at V2 and repeated at V4 (between  
15 10 36+0 to 38+6 weeks of gestation) to assess fetal growth parameters including head  
16 11 circumference, biparietal diameter and abdominal circumference and abdominal fat thickness,  
17 12 femur length (measured and expressed as standardized gestational age related fetal growth  
18 13 percentiles[42]), amnion fluid index as well as size and location of the placenta and fetal  
19 14 subcutaneous tissue thickness. Moreover, fetal growth symmetry will be assessed by fetal  
20 15 head to abdomen circumference ratio and fetal doppler measurements (mainly umbilical artery  
21 16 and middle cerebral artery[43] and ductus venosus). Furthermore, fetal hepatic size (all hepatic  
22 17 diameters, such as area and volume) and umbilical venous volume flow and an  
23 18 echocardiography of the foetus will be performed in a subgroup (only study site Vienna).  
24  
25  
26  
27  
28  
29  
30  
31  
32

### 33 19 **Obstetric outcome**

34 20 Obstetric outcome (caesarean section, birth injury, preterm birth before 37 completed weeks  
35 21 of gestation) stillbirth, small for gestational age (birth weight <10th pctl), large for gestational  
36 22 age infant (birth weight >90th pctl), shoulder dystocia, admitted to neonatal intensive care unit  
37 23 umbilical cord blood pH, Apgar score) will be recorded immediately after delivery. Length of  
38 24 hospital stay for mothers and offspring as well the duration of high-level neonatal care,  
39 25 respiratory distress, fetal hyperbilirubinemia and neonatal death ≤28 days will be further  
40 26 assessed. Calculations of age and sex adjusted percentiles will be performed by using  
41 27 international anthropometric standards according to those used in the CONCEPTT study[44].  
42 28 Neonatal hypoglycaemia is defined as local blood glucose ≤31 mg/dl [1.7 mmol/l] in the first  
43 29 24h after delivery and ≤45 mg/dl [2.5 mmol/l] after the first 24h after delivery or treatment with  
44 30 glucose infusion according to the HAPO study[3]. Additional anthropometric measures of the  
45 31 offspring include head, shoulder and abdominal circumference, length, upper and lower arm  
46 32 and leg circumference and skinfold measurements (suprailiac and subscapular, triceps,  
47 33 quadriceps) in accordance with previous studies[45–47]. Thereby skinfold measurements will  
48 34 be performed by using a validated instrument (Harpenden Skinfold Caliper) within 48h after  
49 35 delivery (VPP1).  
50  
51  
52  
53  
54  
55  
56  
57  
58  
59  
60

### **Assessment of cord blood**

17 ml umbilical cord blood (1x8 ml serum and 1x9 ml EDTA) will be taken immediately after delivery to examine cord-blood glucose, insulin and C-peptide.

### **Postpartum OGTT**

The OGTT will be performed at VPP2 (i.e. 8 – 16 weeks after delivery): after collecting blood samples for measurements of glucose (2 ml blood), insulin and C-peptide (3 ml blood) in the fasting state (at least 8 hours), participating females will receive a standardized 300 ml 75g glucose. Further blood samples of glucose, insulin and C-peptide measurements will be taken at 30, 60, 90, and 120 minutes after intake of glucose. Insulin sensitivity during the OGTT will be assessed by the oral glucose insulin sensitivity index (OGIS) according to Mari et al.[48]; this quantifies dynamic glucose clearance per unit change of insulin. The more recently developed PREDIM index will be used in addition[49]. The new index provides excellent prediction of clamp-derived insulin sensitivity from OGTT or meal data. As an approximation for hepatic insulin resistance the homeostasis model assessment of insulin resistance (HOMA-IR) will be used. Insulin secretion will be calculated by using the C-peptide deconvolution method[50].  $\beta$ -cell function parameters, such as pancreatic glucose sensitivity and rate sensitivity, and potentiation of insulin secretion, will be computed by mathematical modelling[50].

### **Assessment of health-related quality of life and patients' preferences**

Health-related quality of life will be elicited using the SF36 and the EQ-5D-5L[51]. It can be expected that adherence to lifestyle and dietary recommendations are associated with individual risk preferences. Hence, risk and time preferences will be elicited based on a lottery approach[52,53]. Participants will be asked to choose between two hypothetical lotteries that differ in expected outcomes which enables us to derive an individual classification of the risk type, i.e. risk-averse, risk-neutral or risk-loving individuals. Quality of life as well as risk and time preferences will be assessed at V1, VPP1, and VPP2. Obstetrical patient's satisfaction will be additionally assessed at VPP1 by using the Wijma score[54].

### **Patient and public involvement**

Patients and public were not involved in the study design and will not be involved in the study conduct, recruitment and dissemination.

### **Health economic evaluation**

For the evaluation of a complex intervention, a health economic evaluation is recommended as well[55,56]. In this study, a cost-effectiveness (CEA) and a cost-utility analysis (CUA) will be conducted from the perspective of the health insurance. The effect measure employed in

1 the CEA will be the primary outcome of the main trial, i.e. avoided cases of LGA newborns.  
2 Even if the effect parameter of the intervention group will not be superior to the control group,  
3 a health economic evaluation will be performed to inform about efficiency since costs might be  
4 lower in the intervention group [57]. Due to the short intervention period quality-adjusted life-  
5 weeks (QALWs) will be used in the CUA. QALWs will be calculated based on either the EQ-  
6 5D-5L or the SF-6D[58] that derives preference-based scores from the SF-36. To receive  
7 utilities, quality of life will be evaluated by country-specific population-based preferences  
8 separately for each country involved in the trial. Similarly, intervention costs as well as health  
9 care costs (direct costs) will be calculated separately for each country using local prices and  
10 adjusted for local purchasing power parity (PPP). Health care use will be assessed by a  
11 validated instrument that is adapted to the requirements of the study[59]. Health care use will  
12 comprise resource use dedicated to the mother but not the child, e.g. clinical visits, outpatient  
13 contacts, contacts with therapists, and medication. Intervention associated costs are costs of  
14 devices, software, test strips, and costs due to education and training of study participants.  
15 Since the evaluation covers only the observation period alongside the trial, costs and effects  
16 will not be discounted. Comparing the outcomes and costs of the intervention group with the  
17 outcomes and costs of the control group yields the incremental cost-effectiveness ratio (ICER:  
18 additional cost per additional LGA newborn avoided) and the cost-utility ratio (ICUR: additional  
19 costs per additional QALW gained).

## 21 **Reporting of adverse events, data and safety monitoring**

22 Any (serious) adverse events (AE/SAE) are recorded by the investigator using the specific  
23 AE/SAE sheet of the clinical report form (CRF). All SAE are reported to the responsible ethics  
24 committee within an appropriate time frame.

25 Data safety and accuracy as well as patient safety will be monitored by local data and safety  
26 monitoring committees for clinical trials (e.g. the KKS – competence centre for clinical trials –  
27 in Austria).

## 28 **Sample Size and Statistical Analysis**

### 29 *Sample size*

30 With a sample size of n=338 (169 pregnant women per group) we will be able to detect a  
31 difference between two independent proportions of LGA of 13.7% vs 25.8% (according to the  
32 results of a previous study[11]) with a power of 80% and a two-sided type 1 error of  $\alpha=0.05$   
33 (calculated for Pearson's chi-square test). Considering a drop-out rate of 10% a total sample  
34 size of n=372 (186 women per group) is necessary for this study. This is in line with the sample  
35 size suggested by Kestilä et al.[13]. A blinded sample size review (the proportion of LGA cases  
36 in the sample is reviewed) and adaptation is planned after 50% of the patients have been

1 investigated. The sample-size calculation was performed by using the software G\*Power  
2 (V3.1.9.2)[60].

### 3 *Analysis plan*

4 Analyses should be conducted on the intention-to-treat principle. Categorical variables will be  
5 summarized by counts and proportions; continuous variables data will be summarized by  
6 means and standard deviations (SD) or by median and interquartile range in the case of strong  
7 deviations from the normal distribution. Pearson's chi-square test will be used to compare  
8 differences in the primary outcome (difference in proportion of LGA newborns) and for binary  
9 secondary outcomes (such as caesarean section rate, shoulder dystocia and neonatal  
10 hypoglycaemia). Bernard's test will be used as an alternative if an expected frequency in  
11 contingency tables is equal or less than 5 and the Cochran-Mantel-Haenszel method will be  
12 used as sensitivity analysis to adjust for possible centre specific effects. Continuous secondary  
13 outcome parameters (such as mean glucose, duration and amount of hyperglycaemia,  
14 glycaemic variability and other rt-CGM measures, postpartum OGTT data, HbA1c,  
15 glycosylated fibronectin or anthropometric data of the newborn) will be compared by student's  
16 t-test. Rank based inference (such as the Brunner-Munzel test[61]) will be used as an  
17 alternative in case of skewed distributed parameters. The association between HbA1c, rt-CGM  
18 measures and delivery and risk of LGA offspring will be assessed by binary logistic regression.  
19 There are many possible objectives for which further exploratory analysis could be performed  
20 in this study (e.g. functional principal components analysis for rt-CGM data). Hence, the  
21 present analysis plan represents only a selection of methods, which will be used for analysing  
22 the main objectives. Risk preferences will be analysed by non-parametric and parametric  
23 methods. In particular, we plan to classify study participants with respect to their risk tolerance  
24 (risk-aversion, risk-neutral, and risk-loving) and deriving CRRRA (constant relative risk aversion)  
25 utility functions. Associations between risk preferences and behaviour (dietary patterns and  
26 physical activity) will be investigated. For the health economic evaluation, incremental cost-  
27 effectiveness ratios (ICER: Additional cost per additional LGA newborn avoided) and cost-  
28 utility ratios (ICUR: Additional cost per additional quality-adjusted life year gained) will be  
29 calculated. 95% confidence intervals will be analysed using bootstrap procedures[62]. To  
30 consider uncertainty, cost-acceptability curves will be calculated[63]. A two-sided p-value  
31  $\leq 0.05$  is considered statistically significant. All analyses will be performed by using the statistic  
32 software R and contributing packages[64]. No further adjustment for multiplicity is planned for  
33 this study.

## 34 **4. ETHICS AND DISSEMINATION**

35 This study received ethical approval from the main ethic committee in Vienna (1863/2018).  
36 Ethics approval will be obtained by the local institutional review boards in Basel, Berlin,  
37

1  
2  
3 1 Dusseldorf, and Orebro. It was registered under [www.ClinicalTrials.gov](http://www.ClinicalTrials.gov) (NCT03981328). Data  
4 will be presented at international conferences and published in peer-reviewed journals.  
5  
6  
7

8 4 *Author statement*

9  
10 5 EH, KW, JJ, AI, JS, AT, MM, CSG designed the study. MM, AT, AI, MV, GGG, JM, CSG, PR  
11 6 will perform statistical analysis and data interpretation. EH, TL, DE, KW, CK, KW, KS, GYS,  
12 7 IR, WH, KC, JS, CSG will be responsible for patient management. PH, WH, TL, IH, MR, PR,  
13 8 HF, MV, GGG, JM, BW, GYS, CK, KS will make important contributions and critically reviewed  
14 9 this study protocol.  
15  
16  
17  
18

19 11 *Acknowledgements*

20 12 Special thanks to all families who participate in this study.  
21  
22  
23

24 14 *Funding*

25 15 This study is supported by Dexcom grant project number OUS-2018-027. The funding source  
26 16 is not involved in study design, the collection, analysis and interpretation of data, the writing of  
27 17 the manuscript; and in the decision to submit the article for publication.  
28  
29  
30  
31

32 19 *Competing interest statement*

33 20 The authors declare that there are no further financial or personal relationships with other  
34 21 people or organizations that could inappropriately influence the work reported or the  
35 22 conclusions, implications, or opinions stated.  
36  
37  
38  
39  
40  
41  
42  
43  
44  
45  
46  
47  
48  
49  
50  
51  
52  
53  
54  
55  
56  
57  
58  
59  
60

## 5 References

- 1 Catalano PM, Shankar K. Obesity and pregnancy: mechanisms of short term and long term adverse  
2 consequences for mother and child. *BMJ* 2017;**356**:j1.
- 3 Sacks DA, Hadden DR, Maresh M, *et al*. Frequency of Gestational Diabetes Mellitus at Collaborating  
4 Centers Based on IADPSG Consensus Panel-Recommended Criteria: The Hyperglycemia and Adverse  
5 Pregnancy Outcome (HAPO) Study. *Diabetes Care* 2012;**35**:526–8. doi:10.2337/dc11-1641
- 6 Hyperglycemia and Adverse Pregnancy Outcomes. *N Engl J Med* 2008;**358**:1991–2002.  
7 doi:10.1056/NEJMoa0707943
- 8 Dabelea D, Hanson RL, Lindsay RS, *et al*. Intrauterine exposure to diabetes conveys risks for type 2  
9 diabetes and obesity: a study of discordant sibships. *Diabetes* 2000;**49**:2208–11.  
10 doi:10.2337/diabetes.49.12.2208
- 11 Crowther CA, Hiller JE, Moss JR, *et al*. Effect of Treatment of Gestational Diabetes Mellitus on Pregnancy  
12 Outcomes. *N Engl J Med* 2005;**352**:2477–86. doi:10.1056/NEJMoa042973
- 13 Landon MB, Spong CY, Thom E, *et al*. A Multicenter, Randomized Trial of Treatment for Mild Gestational  
14 Diabetes. *N Engl J Med* 2009;**361**:1339–48. doi:10.1056/NEJMoa0902430
- 15 Horvath K, Koch K, Jeitler K, *et al*. Effects of treatment in women with gestational diabetes mellitus:  
16 systematic review and meta-analysis. *BMJ* 2010;**340**:c1395–c1395. doi:10.1136/bmj.c1395
- 17 Klonoff DC, Ahn D, Drincic A. Continuous glucose monitoring: A review of the technology and clinical  
18 use. *Diabetes Res Clin Pract* 2017;**133**:178–92. doi:10.1016/j.diabres.2017.08.005
- 19 Liebl A, Henrichs HR, Heinemann L, *et al*. Continuous Glucose Monitoring: Evidence and Consensus  
20 Statement for Clinical Use. *J Diabetes Sci Technol* 2013;**7**:500–19. doi:10.1177/193229681300700227
- 21 Yogev Y. Continuous glucose monitoring for the evaluation of gravid women with type 1 diabetes mellitus.  
22 *Obstet Gynecol* 2003;**101**:633–8. doi:10.1016/S0029-7844(02)02714-X
- 23 Yu F, Lv L, Liang Z, *et al*. Continuous Glucose Monitoring Effects on Maternal Glycemic Control and  
24 Pregnancy Outcomes in Patients With Gestational Diabetes Mellitus: A Prospective Cohort Study. *J Clin  
25 Endocrinol Metab* 2014;**99**:4674–82. doi:10.1210/jc.2013-4332
- 26 Chen R, Yogev Y, Ben-Haroush A, *et al*. Continuous glucose monitoring for the evaluation and improved  
27 control of gestational diabetes mellitus. *J Matern Fetal Neonatal Med* 2003;**14**:256–60.  
28 doi:10.1080/jmf.14.4.256.260



- 1  
2  
3 1 13 Kestilä KK, Ekblad UU, Rönnemaa T. Continuous glucose monitoring versus self-monitoring of blood  
4 glucose in the treatment of gestational diabetes mellitus. *Diabetes Res Clin Pract* 2007;**77**:174–9.  
5 2  
6 doi:10.1016/j.diabres.2006.12.012  
7 3  
8  
9 4 14 Wei Q, Sun Z, Yang Y, *et al.* Effect of a CGMS and SMBG on Maternal and Neonatal Outcomes in  
10 Gestational Diabetes Mellitus: a Randomized Controlled Trial. *Sci Rep* 2016;**6**. doi:10.1038/srep19920  
11 5  
12 6 15 Ahn D, Pettus J, Edelman S. Unblinded CGM Should Replace Blinded CGM in the Clinical Management of  
13 Diabetes. *J Diabetes Sci Technol* 2016;**10**:793–8. doi:10.1177/1932296816632241  
14 7  
15 8 16 Feig DS, Donovan LE, Corcoy R, *et al.* Continuous glucose monitoring in pregnant women with type 1  
16 diabetes (CONCEPTT): a multicentre international randomised controlled trial. *The Lancet* Published  
17 9  
18 Online First: September 2017. doi:10.1016/S0140-6736(17)32400-5  
19 10  
20 11 17 Alfadhli E, Osman E, Basri T. Use of a real time continuous glucose monitoring system as an educational  
21 tool for patients with gestational diabetes. *Diabetol Metab Syndr* 2016;**8**. doi:10.1186/s13098-016-0161-5  
22 12  
23 18 Polsky S, Garcetti R. CGM, Pregnancy, and Remote Monitoring. *Diabetes Technol Ther* 2017;**19**:S-49-S-  
24 13  
25 59. doi:10.1089/dia.2017.0023  
26 14  
27 15 19 Cosson E, Baz B, Gary F, *et al.* Poor Reliability and Poor Adherence to Self-Monitoring of Blood Glucose  
28 Are Common in Women With Gestational Diabetes Mellitus and May Be Associated With Poor Pregnancy  
29 Outcomes. *Diabetes Care* 2017;**40**:1181–6. doi:10.2337/dc17-0369  
30 16  
31 17  
32 18 20 American Diabetes Association. 2. Classification and Diagnosis of Diabetes: Standards of Medical Care in  
33 Diabetes-2018. *Diabetes Care* 2018;**41**:S13–27. doi:10.2337/dc18-S002  
34 19  
35 20 21 International Association of Diabetes and Pregnancy Study Groups Consensus Panel. International  
36 Association of Diabetes and Pregnancy Study Groups Recommendations on the Diagnosis and  
37 Classification of Hyperglycemia in Pregnancy. *Diabetes Care* 2010;**33**:676–82. doi:10.2337/dc09-1848  
38 20  
39 21  
40 22 22 American Diabetes Association. 13. Management of Diabetes in Pregnancy: *Standards of Medical Care in*  
41 *Diabetes—2018*. *Diabetes Care* 2018;**41**:S137–43. doi:10.2337/dc18-S013  
42 23  
43 24  
44 25 23 Pocock SJ, Simon R. Sequential treatment assignment with balancing for prognostic factors in the  
45 controlled clinical trial. *Biometrics* 1975;**31**:103–15.  
46 26  
47 27 24 Rodbard D. Interpretation of Continuous Glucose Monitoring Data: Glycemic Variability and Quality of  
48 Glycemic Control. *Diabetes Technol Ther* 2009;**11**:S-55-S-67. doi:10.1089/dia.2008.0132  
49 28  
50 29 25 Moscardó V, Herrero P, Reddy M, *et al.* Assessment of Glucose Control Metrics by Discriminant Ratio.  
51 *Diabetes Technol Ther* 2020;**;**dia.2019.0415. doi:10.1089/dia.2019.0415  
52 30  
53  
54  
55  
56  
57  
58  
59  
60

- 1  
2  
3 1 26 Tura A, Morbiducci U, Sbrignadello S, *et al.* Shape of glucose, insulin, C-peptide curves during a 3-h oral  
4  
5 2 glucose tolerance test: any relationship with the degree of glucose tolerance? *Am J Physiol-Regul Integr*  
6  
7 3 *Comp Physiol* 2011;**300**:R941–8. doi:10.1152/ajpregu.00650.2010  
8  
9 4 27 Haftenberger M, Heuer T, Heidemann C, *et al.* Relative validation of a food frequency questionnaire for  
10  
11 5 national health and nutrition monitoring. *Nutr J* 2010;**9**. doi:10.1186/1475-2891-9-36  
12  
13 6 28 Guenther PM, Casavale KO, Reedy J, *et al.* Update of the Healthy Eating Index: HEI-2010. *J Acad Nutr*  
14  
15 7 *Diet* 2013;**113**:569–80. doi:10.1016/j.jand.2012.12.016  
16  
17 8 29 Chiuve SE, Fung TT, Rimm EB, *et al.* Alternative Dietary Indices Both Strongly Predict Risk of Chronic  
18  
19 9 Disease. *J Nutr* 2012;**142**:1009–18. doi:10.3945/jn.111.157222  
20  
21 10 30 Slimani N, Ferrari P, Ocké M, *et al.* Standardization of the 24-hour diet recall calibration method used in  
22  
23 11 the european prospective investigation into cancer and nutrition (EPIC): general concepts and preliminary  
24  
25 12 results. *Eur J Clin Nutr* 2000;**54**:900–17.  
26  
27 13 31 Crispim SP, de Vries JHM, Geelen A, *et al.* Two non-consecutive 24 h recalls using EPIC-Soft software are  
28  
29 14 sufficiently valid for comparing protein and potassium intake between five European centres – results from  
30  
31 15 the European Food Consumption Validation (EFCOVAL) study. *Br J Nutr* 2011;**105**:447–58.  
32  
33 16 doi:10.1017/S0007114510003648  
34  
35 17 32 on behalf of the EFCOVAL Consortium, de Boer EJ, Slimani N, *et al.* The European Food Consumption  
36  
37 18 Validation Project: conclusions and recommendations. *Eur J Clin Nutr* 2011;**65**:S102–7.  
38  
39 19 doi:10.1038/ejcn.2011.94  
40  
41 20 33 on behalf of the EFCOVAL Consortium, Slimani N, Casagrande C, *et al.* The standardized computerized  
42  
43 21 24-h dietary recall method EPIC-Soft adapted for pan-European dietary monitoring. *Eur J Clin Nutr*  
44  
45 22 2011;**65**:S5–15. doi:10.1038/ejcn.2011.83  
46  
47 23 34 Craig CL, Marshall AL, Sjöström M, *et al.* International physical activity questionnaire: 12-country  
48  
49 24 reliability and validity. *Med Sci Sports Exerc* 2003;**35**:1381–95.  
50  
51 25 doi:10.1249/01.MSS.0000078924.61453.FB  
52  
53 26 35 Committee IR. Guidelines for data processing and analysis of the International Physical Activity  
54  
55 27 Questionnaire (IPAQ)–short and long forms. 2005.  
56  
57 28 36 Chasan-Taber L, Schmidt MD, Roberts DE, *et al.* Development and validation of a Pregnancy Physical  
58  
59 29 Activity Questionnaire. *Med Sci Sports Exerc* 2004;**36**:1750–60.  
60

- 1  
2  
3 1 37 Krssak M, Roden M. The role of lipid accumulation in liver and muscle for insulin resistance and type 2  
4 diabetes mellitus in humans. *Rev Endocr Metab Disord* 2004;**5**:127–34.  
5 2  
6 doi:10.1023/B:REMD.0000021434.98627.dc  
7 3  
8  
9 4 38 Prikoszovich T, Winzer C, Schmid AI, *et al.* Body and Liver Fat Mass Rather Than Muscle Mitochondrial  
10 Function Determine Glucose Metabolism in Women With a History of Gestational Diabetes Mellitus.  
11 5  
12 *Diabetes Care* 2011;**34**:430–6. doi:10.2337/dc10-1002  
13 6  
14 7 39 Livingstone RS, Begovatz P, Kahl S, *et al.* Initial clinical application of modified Dixon with flexible echo  
15 8  
16 times: hepatic and pancreatic fat assessments in comparison with 1H MRS. *Magn Reson Mater Phys Biol*  
17 9  
18 *Med* 2014;**27**:397–405. doi:10.1007/s10334-013-0421-4  
19 10  
20 10 40 Hodson K, Man CD, Smith FE, *et al.* Mechanism of insulin resistance in normal pregnancy. *Horm Metab*  
21 11  
22 *Res Horm Stoffwechselforschung Horm Metab* 2013;**45**:567–71. doi:10.1055/s-0033-1337988  
23 12  
24 12 41 Hodson K, Dalla Man C, Smith FE, *et al.* Liver triacylglycerol content and gestational diabetes: effects of  
25 13  
26 moderate energy restriction. *Diabetologia* 2017;**60**:306–13. doi:10.1007/s00125-016-4143-9  
27 14  
28 14 42 Hadlock FP, Deter RL, Harrist RB, *et al.* Estimating fetal age: computer-assisted analysis of multiple fetal  
29 15  
30 growth parameters. *Radiology* 1984;**152**:497–501. doi:10.1148/radiology.152.2.6739822  
31 16  
32 16 43 Salomon LJ, Alfirevic Z, Berghella V, *et al.* Practice guidelines for performance of the routine mid-  
33 17  
34 trimester fetal ultrasound scan. *Ultrasound Obstet Gynecol Off J Int Soc Ultrasound Obstet Gynecol*  
35 18  
36 2011;**37**:116–26. doi:10.1002/uog.8831  
37 19  
38 19 44 Gestation Network. Gestation Network. 2018.<https://www.gestation.net/cc/about.htm>  
39 20  
40 20 45 Brans YW, Sumners JE, Dweck HS, *et al.* A Noninvasive Approach to Body Composition in the Neonate:  
41 21  
42 Dynamic Skinfold Measurements. *Pediatr Res* 1974;**8**:215–22. doi:10.1203/00006450-197404000-00001  
43 22  
44 22 46 Dauncey MJ, Gandy G, Gairdner D. Assessment of total body fat in infancy from skinfold thickness  
45 23  
46 measurements. *Arch Dis Child* 1977;**52**:223–7.  
47 24  
48 24 47 Jelsma JG, van Poppel MN, Galjaard S, *et al.* DALI: Vitamin D and lifestyle intervention for gestational  
49 25  
50 diabetes mellitus (GDM) prevention: an European multicentre, randomised trial – study protocol. *BMC*  
51 26  
52 *Pregnancy Childbirth* 2013;**13**. doi:10.1186/1471-2393-13-142  
53 27  
54 27 48 Mari A, Pacini G, Murphy E, *et al.* A Model-Based Method for Assessing Insulin Sensitivity From the Oral  
55 28  
56 Glucose Tolerance Test. *Diabetes Care* 2001;**24**:539–48. doi:10.2337/diacare.24.3.539  
57 29  
58 29 49 Tura A, Chemello G, Szendroedi J, *et al.* Prediction of clamp-derived insulin sensitivity from the oral  
59 30  
60 glucose insulin sensitivity index. *Diabetologia* 2018;**61**:1135–41. doi:10.1007/s00125-018-4568-4

- 1  
2  
3 1 50 Mari A, Tura A, Gastaldelli A, *et al.* Assessing insulin secretion by modeling in multiple-meal tests: role of  
4  
5 2  
6  
7 3 51 Hinz A, Kohlmann T, Stöbel-Richter Y, *et al.* The quality of life questionnaire EQ-5D-5L: psychometric  
8  
9 4  
10 5  
11 52 Holt CA, Laury SK. Risk Aversion and Incentive Effects. *Am Econ Rev* 2002;**92**:1644–55.  
12  
13 6  
14 7  
15 53 Andersen S, Harrison GW, Lau MI, *et al.* Eliciting Risk and Time Preferences. *Econometrica* 2008;**76**:583–  
16  
17 8  
18 9 618. doi:10.1111/j.1468-0262.2008.00848.x  
19  
20 10 54 Wijma K, Wijma B, Zar M. Psychometric aspects of the W-DEQ; a new questionnaire for the measurement  
21  
22 11  
23 12 55 Craig P, Dieppe P, Macintyre S, *et al.* Developing and evaluating complex interventions: the new Medical  
24  
25 13  
26 14 56 Drummond MF. *Methods for the economic evaluation of health care programmes*. 3rd ed. Oxford  
27  
28 15  
29 30 57 Schöffski O, Schulenburg J-MG von der, editors. *Gesundheitsökonomische Evaluationen*. 4th ed. Berlin  
31  
32 16  
33 17 Heidelberg: : Springer-Verlag 2012. doi:10.1007/978-3-642-21700-5  
34  
35 18 58 Brazier J, Roberts J, Deverill M. The estimation of a preference-based measure of health from the SF-36. *J*  
36  
37 19  
38 20 59 Chernyak N, Ernsting C, Icks A. Pre-test of questions on health-related resource use and expenditure, using  
39  
40 21  
41 22 6963-12-303  
42  
43 22  
44 23 60 Faul F, Erdfelder E, Lang A-G, *et al.* G\*Power 3: a flexible statistical power analysis program for the  
45  
46 24  
47 25 61 Brunner E, Munzel U. The Nonparametric Behrens-Fisher Problem: Asymptotic Theory and a Small-  
48  
49 26  
50 27 Sample Approximation. *Biom J* 2000;**42**:17–25. doi:10.1002/(SICI)1521-4036(200001)42:1<17::AID-  
51  
52 28  
53 29 BIMJ17>3.0.CO;2-U  
54  
55 28 62 Briggs AH, Wonderling DE, Mooney CZ. Pulling cost-effectiveness analysis up by its bootstraps: a non-  
56  
57 29  
58 30 63 Fenwick E, O'Brien BJ, Briggs A. Cost-effectiveness acceptability curves– facts, fallacies and frequently  
59  
60 31  
61 asked questions. *Health Econ* 2004;**13**:405–15. doi:10.1002/hec.903

1  
2  
3  
4  
5  
6  
7  
8  
9  
10  
11  
12  
13  
14  
15  
16  
17  
18  
19  
20  
21  
22  
23  
24  
25  
26  
27  
28  
29  
30  
31  
32  
33  
34  
35  
36  
37  
38  
39  
40  
41  
42  
43  
44  
45  
46  
47  
48  
49  
50  
51  
52  
53  
54  
55  
56  
57  
58  
59  
60

1 64 R Core Team. *R: A language and environment for statistical computing*. 2017. <https://www.R-project.org/>

2 **6 FIGURES**

3  
4 Figure 1: Patient flow diagram  
5

For peer review only

BMJ Open  
GDM Diagnosis

**STUDY VISIT 1 (V1)**  
Informed Consent, Lifestyle intervention, SMBG advice, Medical history and risk evaluation, Questionnaires (8-SF-36, health care use, FFQ, IPAQ, PPAQ, preferences)

**STUDY VISIT 2 (V2)**  
6-8d after V1, Randomisation (n=372), non-fasting blood sample (A1c, glycosylated fibrinogen), US (fetal biometry, amnion fluid index, placenta size, FSCTT, fetal doppler, hepatic size, echocardiatic examination), 24h recall (subgroup)

**SMBG Group (n=186)**  
Start nutritional protocol (7d), Start blinded CGM (8-10d)

**RT-CGM Group (n=186)**  
Start nutritional protocol (7d)

**STUDY VISIT 3 (V3)**  
8-10d after study visit 2, Download blinded CGM data, Download SMBG measurements, MR spectroscopy (subgroup), Adaptation of treatment

**STUDY VISIT 3 (V3)**  
8-10d after study visit 2, Download CGM data, Download SMBG measurements (if any), MR spectroscopy (subgroup), Adaptation of treatment

**Routine Follow-up visits**  
Every 2 weeks (i.e. 12-16 days after V3), Download SMBG measurements, Fetal biometry and Adaptation of treatment as usual care

**Routine Follow-up visits**  
Every 2 weeks (i.e. 12-16 days after V3), Download CGM data, Download SMBG measurements (if any), Fetal biometry and Adaptation of treatment as usual care

**STUDY VISIT 4 (V4)**  
36+0-38+6 weeks of gestation, start blinded CGM and download data after 8-10d, Download SMBG measurements, Start nutritional protocol (8-10d), non-fasting blood sample (HbA1c, glycosylated fibrinogen), US (fetal biometry, amnion fluid index, placenta size, FSCTT, fetal doppler, hepatic size, echocardiatic examination), 24h recall (subgroup)

**STUDY VISIT 4 (V4)**  
36+0-38+6 weeks of gestation, Download CGM data, Download SMBG measurements (if any), Start nutritional protocol (8-10d), non-fasting blood sample (HbA1c, glycosylated fibrinogen), US (fetal biometry, amnion fluid index, placenta size, FSCTT, fetal doppler, hepatic size, echocardiatic examination), 24h recall (subgroup)

**STUDY VISIT Post Partum 0 (VPP0)**  
Delivery, Cord blood (glucose, insulin, C-peptide), Placenta tissue (subgroup)

**STUDY VISIT Post Partum 0 (VPP0)**  
Delivery, Cord blood (glucose, insulin, C-peptide), Placenta tissue (subgroup)

**STUDY VISIT Post Partum 1 (VPP1)**  
Up to 48h after delivery, Neonatal parameters, maternal non-fasting blood sample (HbA1c, glycosylated fibrinogen), Questionnaires (8-SF-36, health care use, FFQ, IPAQ, PPAQ, preferences, Wijma score)

**STUDY VISIT Post Partum 1 (VPP1)**  
Up to 48h after delivery, Neonatal parameters, Download CGM data, Download SMBG measurements (if any), maternal non-fasting blood sample (HbA1c, glycosylated fibrinogen), Download CGM data, Questionnaires (8-SF-36, health care use, FFQ, IPAQ, PPAQ, preferences, Wijma score)

**STUDY VISIT Post Partum 2 (VPP2)**  
8-16 weeks after delivery, OGTT, blinded CGM (8-10d), blood sample (HbA1c, glycosylated fibrinogen), MR spectroscopy (subgroup), 24h recall (subgroup), Questionnaires (8-SF-36, health care use, FFQ, IPAQ, PPAQ, preferences, Wijma score)

**STUDY VISIT Post Partum 2 (VPP2)**  
8-16 weeks after delivery, OGTT, blinded CGM (8-10d), blood sample (HbA1c, glycosylated fibrinogen), MR spectroscopy (subgroup), 24h recall (subgroup), Questionnaires (8-SF-36, health care use, FFQ, IPAQ, PPAQ, preferences, Wijma score)

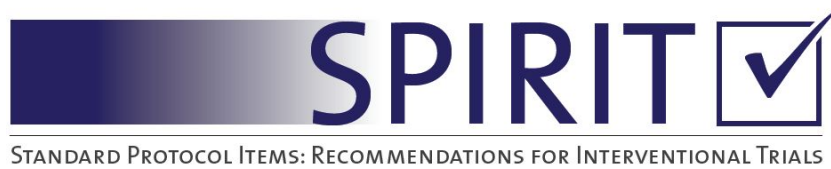

STANDARD PROTOCOL ITEMS: RECOMMENDATIONS FOR INTERVENTIONAL TRIALS

SPIRIT 2013 Checklist: Recommended items to address in a clinical trial protocol and related documents\*

| Section/item                      | Item No | Description                                                                                                                                                                                                                                                                              |
|-----------------------------------|---------|------------------------------------------------------------------------------------------------------------------------------------------------------------------------------------------------------------------------------------------------------------------------------------------|
| <b>Administrative information</b> |         |                                                                                                                                                                                                                                                                                          |
| Title                             | 1       | Descriptive title identifying the study design, population, interventions, and, if applicable, trial acronym → <a href="#">title page</a>                                                                                                                                                |
| Trial registration                | 2a      | Trial identifier and registry name. If not yet registered, name of intended registry → <a href="#">page 3</a>                                                                                                                                                                            |
|                                   | 2b      | All items from the World Health Organization Trial Registration Data Set                                                                                                                                                                                                                 |
| Protocol version                  | 3       | Date and version identifier → only in original protocol                                                                                                                                                                                                                                  |
| Funding                           | 4       | <a href="#">Sources and types of financial, material, and other support → page 18</a>                                                                                                                                                                                                    |
| Roles and responsibilities        | 5a      | Names, affiliations, and roles of protocol contributors → <a href="#">page 2</a>                                                                                                                                                                                                         |
|                                   | 5b      | Name and contact information for the trial sponsor → <a href="#">page 1/18</a>                                                                                                                                                                                                           |
|                                   | 5c      | Role of study sponsor and funders, if any, in study design; collection, management, analysis, and interpretation of data; writing of the report; and the decision to submit the report for publication, including whether they will have ultimate authority over any of these activities |
|                                   | 5d      | Composition, roles, and responsibilities of the coordinating centre, steering committee, endpoint adjudication committee, data management team, and other individuals or groups overseeing the trial, if applicable (see Item 21a for data monitoring committee)                         |
| <b>Introduction</b>               |         |                                                                                                                                                                                                                                                                                          |
| Background and rationale          | 6a      | Description of research question and justification for undertaking the trial, including summary of relevant studies (published and unpublished) examining benefits and harms for each intervention → <a href="#">page 5-7 (Introduction)</a>                                             |
|                                   | 6b      | Explanation for choice of comparators                                                                                                                                                                                                                                                    |
| Objectives                        | 7       | Specific objectives or hypotheses → <a href="#">page 7 (Hypotheses)</a>                                                                                                                                                                                                                  |

1  
2  
3  
4  
5  
6  
7  
8  
9  
10  
11  
12  
13  
14  
15  
16  
17  
18  
19  
20  
21  
22  
23  
24  
25  
26  
27  
28  
29  
30  
31  
32  
33  
34  
35  
36  
37  
38  
39  
40  
41  
42  
43  
44  
45  
46  
47  
48  
49  
50  
51  
52  
53  
54  
55  
56  
57  
58  
59  
60

Trial design 8 Description of trial design including type of trial (eg, parallel group, crossover, factorial, single group), allocation ratio, and framework (eg, superiority, equivalence, noninferiority, exploratory) → [see Title](#)

### Methods: Participants, interventions, and outcomes

Study setting 9 Description of study settings (eg, community clinic, academic hospital) and list of countries where data will be collected. Reference to where list of study sites can be obtained → [page 8](#)

Eligibility criteria 10 Inclusion and exclusion criteria for participants. If applicable, eligibility criteria for study centres and individuals who will perform the interventions (eg, surgeons, psychotherapists) → [page 8 \(Eligibility criteria\)](#)

Interventions 11a Interventions for each group with sufficient detail to allow replication, including how and when they will be administered → [page 8/9 \(Study procedure\)](#)

11b Criteria for discontinuing or modifying allocated interventions for a given trial participant (eg, drug dose change in response to harms, participant request, or improving/worsening disease) → [not applicable](#)

11c Strategies to improve adherence to intervention protocols, and any procedures for monitoring adherence (eg, drug tablet return, laboratory tests) → [not applicable](#)

11d Relevant concomitant care and interventions that are permitted or prohibited during the trial → [not applicable](#)

Outcomes 12 Primary, secondary, and other outcomes, including the specific measurement variable (eg, systolic blood pressure), analysis metric (eg, change from baseline, final value, time to event), method of aggregation (eg, median, proportion), and time point for each outcome. Explanation of the clinical relevance of chosen efficacy and harm outcomes is strongly recommended → [page 6 \(Study outcomes\)](#)

Participant timeline 13 Time schedule of enrolment, interventions (including any run-ins and washouts), assessments, and visits for participants. A schematic diagram is highly recommended (see Figure) → [page 8/9](#)

Sample size 14 Estimated number of participants needed to achieve study objectives and how it was determined, including clinical and statistical assumptions supporting any sample size calculations → [page 17/18 \(Sample size justification\)](#)

Recruitment 15 Strategies for achieving adequate participant enrolment to reach target sample size

**Methods: Assignment of interventions (for controlled trials)** → [page 9](#)



## Allocation:

- 1  
2  
3  
4 Sequence generation 16a Method of generating the allocation sequence (eg, computer-generated random numbers), and list of any factors for stratification. To reduce predictability of a random sequence, details of any planned restriction (eg, blocking) should be provided in a separate document that is unavailable to those who enrol participants or assign interventions
- 5  
6  
7  
8  
9  
10  
11  
12 Allocation concealment mechanism 16b Mechanism of implementing the allocation sequence (eg, central telephone; sequentially numbered, opaque, sealed envelopes), describing any steps to conceal the sequence until interventions are assigned
- 13  
14  
15  
16  
17  
18 Implementation 16c Who will generate the allocation sequence, who will enrol participants, and who will assign participants to interventions
- 19  
20  
21 Blinding (masking) 17a Who will be blinded after assignment to interventions (eg, trial participants, care providers, outcome assessors, data analysts), and how → not applicable
- 22  
23  
24  
25  
26 17b If blinded, circumstances under which unblinding is permissible, and procedure for revealing a participant's allocated intervention during the trial → not applicable
- 27  
28  
29

**Methods: Data collection, management, and analysis**

- 30  
31  
32 Data collection methods 18a Plans for assessment and collection of outcome, baseline, and other trial data, including any related processes to promote data quality (eg, duplicate measurements, training of assessors) and a description of study instruments (eg, questionnaires, laboratory tests) along with their reliability and validity, if known. Reference to where data collection forms can be found, if not in the protocol
- 33  
34  
35  
36  
37  
38  
39  
40 18b Plans to promote participant retention and complete follow-up, including list of any outcome data to be collected for participants who discontinue or deviate from intervention protocols
- 41  
42  
43  
44 Data management 19 Plans for data entry, coding, security, and storage, including any related processes to promote data quality (eg, double data entry; range checks for data values). Reference to where details of data management procedures can be found, if not in the protocol
- 45  
46  
47  
48  
49  
50 Statistical methods 20a Statistical methods for analysing primary and secondary outcomes. Reference to where other details of the statistical analysis plan can be found, if not in the protocol → page 13-15 (Study analysis plan)
- 51  
52  
53  
54 20b Methods for any additional analyses (eg, subgroup and adjusted analyses) → page 15-19 (Other study measurements)
- 55  
56  
57  
58  
59  
60

- 1  
2  
3  
4  
5  
6  
7  
8  
9  
10  
11  
12  
13  
14  
15  
16  
17  
18  
19  
20  
21  
22  
23  
24  
25  
26  
27  
28  
29  
30  
31  
32  
33  
34  
35  
36  
37  
38  
39  
40  
41  
42  
43  
44  
45  
46  
47  
48  
49  
50  
51  
52  
53  
54  
55  
56  
57  
58  
59  
60
- 20c Definition of analysis population relating to protocol non-adherence (eg, as randomised analysis), and any statistical methods to handle missing data (eg, multiple imputation)

### Methods: Monitoring

- Data monitoring 21a Composition of data monitoring committee (DMC); summary of its role and reporting structure; statement of whether it is independent from the sponsor and competing interests; and reference to where further details about its charter can be found, if not in the protocol. Alternatively, an explanation of why a DMC is not needed
- 21b Description of any interim analyses and stopping guidelines, including who will have access to these interim results and make the final decision to terminate the trial
- Harms 22 Plans for collecting, assessing, reporting, and managing solicited and spontaneously reported adverse events and other unintended effects of trial interventions or trial conduct → see Reporting of adverse events, page 17
- Auditing 23 Frequency and procedures for auditing trial conduct, if any, and whether the process will be independent from investigators and the sponsor

### Ethics and dissemination

- Research ethics approval 24 Plans for seeking research ethics committee/institutional review board (REC/IRB) approval → page 8 (Study settings/design)
- Protocol amendments 25 Plans for communicating important protocol modifications (eg, changes to eligibility criteria, outcomes, analyses) to relevant parties (eg, investigators, REC/IRBs, trial participants, trial registries, journals, regulators)
- Consent or assent 26a Who will obtain informed consent or assent from potential trial participants or authorised surrogates, and how (see Item 32)
- 26b Additional consent provisions for collection and use of participant data and biological specimens in ancillary studies, if applicable
- Confidentiality 27 How personal information about potential and enrolled participants will be collected, shared, and maintained in order to protect confidentiality before, during, and after the trial → page 9 (Data recording)
- Declaration of interests 28 Financial and other competing interests for principal investigators for the overall trial and each study site → (page 3 (Conflict of interest))
- Access to data 29 Statement of who will have access to the final trial dataset, and disclosure of contractual agreements that limit such access for investigators

|    |                   |     |                                                                              |
|----|-------------------|-----|------------------------------------------------------------------------------|
| 1  |                   |     |                                                                              |
| 2  | Ancillary and     | 30  | Provisions, if any, for ancillary and post-trial care, and for               |
| 3  | post-trial care   |     | compensation to those who suffer harm from trial participation               |
| 4  |                   |     |                                                                              |
| 5  | Dissemination     | 31a | Plans for investigators and sponsor to communicate trial results to          |
| 6  | policy            |     | participants, healthcare professionals, the public, and other relevant       |
| 7  |                   |     | groups (eg, via publication, reporting in results databases, or other        |
| 8  |                   |     | data sharing arrangements), including any publication restrictions →         |
| 9  |                   |     | page 18                                                                      |
| 10 |                   |     |                                                                              |
| 11 |                   | 31b | Authorship eligibility guidelines and any intended use of professional       |
| 12 |                   |     | writers                                                                      |
| 13 |                   |     |                                                                              |
| 14 |                   | 31c | Plans, if any, for granting public access to the full protocol, participant- |
| 15 |                   |     | level dataset, and statistical code                                          |
| 16 |                   |     |                                                                              |
| 17 |                   |     |                                                                              |
| 18 |                   |     |                                                                              |
| 19 | <b>Appendices</b> |     |                                                                              |
| 20 |                   |     |                                                                              |
| 21 | Informed consent  | 32  | Model consent form and other related documentation given to                  |
| 22 | materials         |     | participants and authorised surrogates                                       |
| 23 |                   |     |                                                                              |
| 24 | Biological        | 33  | Plans for collection, laboratory evaluation, and storage of biological       |
| 25 | specimens         |     | specimens for genetic or molecular analysis in the current trial and for     |
| 26 |                   |     | future use in ancillary studies, if applicable                               |
| 27 |                   |     |                                                                              |

---

\*It is strongly recommended that this checklist be read in conjunction with the SPIRIT 2013 Explanation & Elaboration for important clarification on the items. Amendments to the protocol should be tracked and dated. The SPIRIT checklist is copyrighted by the SPIRIT Group under the Creative Commons "[Attribution-NonCommercial-NoDerivs 3.0 Unported](https://creativecommons.org/licenses/by-nc-nd/3.0/)" license.
